# Supplementary material
Source: PubMed Central journal article supplement (PMC5253272)
Supplement: NIHMS827983-supplement.pdf [file NIHMS827983-supplement.pdf]

## **APPENDICES**

**Appendix Table 1.** Search Strategy and Eligibility Criteria

**Appendix Table 2.** Coding of Included Articles

**Appendix Table 3.** Study Design and Outcomes Assessed for Studies Relevant to Smoking  
Cessation and Vaping

**Appendix Table 1.** Search Strategy and Eligibility Criteria

| <b>Database and search strategy</b>                                                                                                                                       | <b>Eligibility criteria</b>                                                                                                                                                                                                                                                                                                                                                                                                                                                                                                                                                                                                                                                                                                                                                                           |
|---------------------------------------------------------------------------------------------------------------------------------------------------------------------------|-------------------------------------------------------------------------------------------------------------------------------------------------------------------------------------------------------------------------------------------------------------------------------------------------------------------------------------------------------------------------------------------------------------------------------------------------------------------------------------------------------------------------------------------------------------------------------------------------------------------------------------------------------------------------------------------------------------------------------------------------------------------------------------------------------|
| National Library of Medicine's PubMed:<br><br>"e-cigarette*" OR "electronic cigarette" OR "electronic cigarettes" OR "electronic nicotine delivery" OR "vape" OR "vaping" | <p>Inclusion criteria:</p> <ul style="list-style-type: none"><li>• Empirical research related to ENDS published in a peer-reviewed journal</li></ul> <p>Exclusion criteria:</p> <ul style="list-style-type: none"><li>• Not in English language</li><li>• Not relevant to ENDS</li><li>• No original data presented (review, commentary, letter to the editor, editorial, practice guideline, position statement, study protocol, news article, book, meeting proceedings)</li></ul> <p>Eligible study designs:</p> <ul style="list-style-type: none"><li>• experimental studies, quasi-experimental studies, observational studies (including case control, cohort and cross sectional studies), case reports, case series, qualitative studies, mixed methods, preclinical/animal studies</li></ul> |

---

ENDS, electronic nicotine delivery systems

**Appendix**  
**Overview of Electronic Nicotine Delivery Systems: A Systematic Review**  
**Glasser et al.**

**Appendix Table 2.** Coding of Included Articles

|                    |                                                                                                                                                                        | Product features | Health effects | Addictiveness | Consumer perceptions | Patterns of use | Marketing | Sales | Policies | Cessation |
|--------------------|------------------------------------------------------------------------------------------------------------------------------------------------------------------------|------------------|----------------|---------------|----------------------|-----------------|-----------|-------|----------|-----------|
| Abo-Elkheir (2016) | Knowledge about electronic cigarettes and its perception: a community survey, Egypt.                                                                                   |                  |                |               | X                    | X               |           |       |          |           |
| Adkison (2013)     | Electronic nicotine delivery systems: international tobacco control four-country survey.                                                                               |                  |                |               | X                    | X               |           |       |          | X         |
| Adriaens (2014)    | Effectiveness of the electronic cigarette: An eight-week flemish study with six-month follow-up on smoking reduction, craving and experienced benefits and complaints. |                  |                | X             |                      |                 |           |       |          | X         |
| Agaku (2013)       | The Effect of Exposure to Pro-Tobacco Advertising on Experimentation With Emerging Tobacco Products Among U.S. Adolescents.                                            |                  |                |               |                      | X               | X         |       |          |           |
| Agaku (2014)       | Tobacco product use among adults--United States, 2012-2013.                                                                                                            |                  |                |               |                      | X               |           |       |          |           |
| Alcala (2016)      | E-cigarette use and disparities by race, citizenship status and language among adolescents.                                                                            |                  |                |               |                      | X               |           |       |          |           |
| Al-Delaimy (2015)  | E-cigarette use in the past and quitting behavior in the future: a population-based study.                                                                             |                  |                |               |                      |                 |           |       |          | X         |
| Ali (2016)         | Risk Profiles of Youth Single, Dual, and Poly Tobacco Users.                                                                                                           |                  |                |               |                      | X               |           |       |          |           |
| Allem (2015)       | Tobacco Attitudes and Behaviors of Vape Shop Retailers in Los Angeles.                                                                                                 |                  |                |               | X                    | X               |           |       |          | X         |
| Allem (2015)       | Characteristics of emerging adulthood and e-cigarette use: Findings from a pilot study.                                                                                |                  |                |               |                      | X               |           |       |          |           |
| Allem (2016)       | Campaigns and counter campaigns: reactions on Twitter to e-cigarette education.                                                                                        |                  |                |               |                      |                 | X         |       |          |           |
| Allen (2015)       | Flavoring Chemicals in E-Cigarettes: Diacetyl, 2,3-Pentanedione, and Acetoin in a Sample of 51 Products, Including Fruit-, Candy-, and Cocktail-Flavored E-Cigarettes. | X                |                |               |                      |                 |           |       |          |           |
| Amato (2016)       | How to define e-cigarette prevalence? Finding clues in the use frequency distribution.                                                                                 |                  |                |               | X                    | X               |           |       |          |           |
| Ambrose (2014)     | Perceptions of the relative harm of cigarettes and e-cigarettes among U.S. youth.                                                                                      |                  |                |               | X                    | X               |           |       |          |           |
| Amrock (2014)      | Perception of e-cigarette harm and its correlation with use among U.S. adolescents.                                                                                    |                  |                |               | X                    | X               |           |       |          |           |
| Anand (2015)       | E-cigarette Use and Beliefs Among Urban Public High School Students in North Carolina.                                                                                 |                  |                |               | X                    | X               |           |       |          |           |
| Andler (2016)      | Electronic cigarette use in France in 2014.                                                                                                                            |                  |                |               | X                    | X               |           |       |          | X         |

**Appendix**  
**Overview of Electronic Nicotine Delivery Systems: A Systematic Review**  
**Glasser et al.**

|                          |                                                                                                                                    | Product features | Health effects | Addictiveness | Consumer perceptions | Patterns of use | Marketing | Sales | Policies | Cessation |
|--------------------------|------------------------------------------------------------------------------------------------------------------------------------|------------------|----------------|---------------|----------------------|-----------------|-----------|-------|----------|-----------|
| Arrazola (2014)          | Tobacco use among middle and high school students--United States, 2013.                                                            |                  |                |               |                      | X               |           |       |          |           |
| Arrazola (2015)          | Tobacco use among middle and high school students - United States, 2011-2014.                                                      |                  |                |               |                      | X               |           |       |          |           |
| Aug (2015)               | E-Cigarette Affects the Metabolome of Primary Normal Human Bronchial Epithelial Cells.                                             |                  | X              |               |                      |                 |           |       |          |           |
| Ayers (2011)             | Tracking the rise in popularity of electronic nicotine delivery systems (electronic cigarettes) using search query surveillance.   |                  |                |               |                      |                 | X         |       |          |           |
| Ayers (2016)             | Revisiting the Rise of Electronic Nicotine Delivery Systems Using Search Query Surveillance.                                       |                  |                |               |                      |                 | X         |       |          |           |
| Babineau (2015)          | Electronic Cigarette Use among Irish Youth: A Cross Sectional Study of Prevalence and Associated Factors.                          |                  |                |               |                      | X               |           |       |          |           |
| Baeza-Loya (2014)        | Perceptions about e-cigarette safety may lead to e-smoking during pregnancy.                                                       |                  |                |               | X                    |                 |           |       |          |           |
| Bagcchi (2014)           | E-cigarette market expands online.                                                                                                 |                  |                |               |                      |                 |           | X     |          |           |
| Baggett (2016)           | Other tobacco product and electronic cigarette use among homeless cigarette smokers.                                               |                  |                |               | X                    | X               |           |       |          |           |
| Bahl (2012)              | Comparison of electronic cigarette refill fluid cytotoxicity using embryonic and adult models.                                     |                  | X              |               |                      |                 |           |       |          |           |
| Ballbè (2014)            | Cigarettes vs. e-cigarettes: Passive exposure at home measured by means of airborne marker and biomarkers.                         |                  | X              |               |                      |                 |           |       |          |           |
| Barbeau (2013)           | Perceived efficacy of e-cigarettes versus nicotine replacement therapy among successful e-cigarette users: a qualitative approach. |                  |                |               | X                    |                 |           |       |          |           |
| Barnett (2015)           | Adolescent Electronic Cigarette Use: Associations With Conventional Cigarette and Hookah Smoking.                                  |                  |                |               |                      | X               |           |       |          |           |
| Barnoya (2015)           | Nicotine replacement therapy, tobacco products, and electronic cigarettes in pharmacies in St. Louis, Missouri.                    |                  |                |               |                      |                 |           | X     |          |           |
| Barrington-Trimis (2015) | Psychosocial Factors Associated With Adolescent Electronic Cigarette and Cigarette Use.                                            |                  |                |               | X                    | X               |           |       |          |           |
| Barrington-Trimis (2016) | The E-cigarette Social Environment, E-cigarette Use, and Susceptibility to Cigarette Smoking.                                      |                  |                |               |                      | X               |           |       |          |           |

**Appendix**  
**Overview of Electronic Nicotine Delivery Systems: A Systematic Review**  
**Glasser et al.**

|                 |                                                                                                                                                                                   | Product features | Health effects | Addictiveness | Consumer perceptions | Patterns of use | Marketing | Sales | Policies | Cessation |
|-----------------|-----------------------------------------------------------------------------------------------------------------------------------------------------------------------------------|------------------|----------------|---------------|----------------------|-----------------|-----------|-------|----------|-----------|
| Bartoli (2014)  | Prevalence and correlates of binge drinking among young adults using alcohol: a cross-sectional survey.                                                                           |                  |                |               |                      | X               |           |       |          |           |
| Basch (2016)    | Provision of information regarding electronic cigarettes from shop employees in New York City.                                                                                    |                  |                |               | X                    |                 |           |       |          |           |
| Basch (2016)    | YouTube videos related to e-cigarette safety and related health risks: implications for preventing and emerging epidemic.                                                         |                  |                |               |                      |                 | X         |       |          |           |
| Bascombe (2016) | Primary healthcare provider knowledge, beliefs and clinic-based practices regarding alternative tobacco products and marijuana: a qualitative study.                              |                  |                |               | X                    |                 |           |       |          |           |
| Baumann (2014)  | Differences in Electronic Cigarette Awareness, Use History, and Advertisement Exposure Between Black and White Hospitalized Cigarette Smokers.                                    |                  |                |               | X                    | X               | X         |       |          |           |
| Beard (2014)    | How are the English Stop Smoking Services responding to growth in use of electronic cigarettes?                                                                                   |                  |                |               | X                    |                 |           |       |          |           |
| Beard (2015)    | Has growth in electronic cigarette use by smokers been responsible for the decline in use of licensed nicotine products? Findings from repeated cross-sectional surveys.          |                  |                |               |                      |                 |           |       |          | X         |
| Beauval (2016)  | Trace elements in e-liquids - Development and validation of an ICP-MS method for the analysis of electronic cigarette refills.                                                    | X                |                |               |                      |                 |           |       |          |           |
| Behar (2014)    | Identification of toxicants in cinnamon-flavored electronic cigarette refill fluids.                                                                                              |                  | X              |               |                      |                 |           |       |          |           |
| Behar (2015)    | Puffing topography and nicotine intake of electronic cigarette users.                                                                                                             |                  |                | X             | X                    |                 |           |       |          |           |
| Berg (2014)     | Attitudes toward E-Cigarettes, Reasons for Initiating E-Cigarette Use, and Changes in Smoking Behavior after Initiation: A Pilot Longitudinal Study of Regular Cigarette Smokers. |                  |                |               |                      |                 |           |       |          | X         |
| Berg (2015)     | Perceived harm, addictiveness, and social acceptability of tobacco products and marijuana among young adults: marijuana, hookah, and electronic cigarettes win.                   |                  |                |               | X                    | X               |           |       |          |           |

**Appendix**  
**Overview of Electronic Nicotine Delivery Systems: A Systematic Review**  
**Glasser et al.**

|                  |                                                                                                                                                                                                 | Product features | Health effects | Addictiveness | Consumer perceptions | Patterns of use | Marketing | Sales | Policies | Cessation |
|------------------|-------------------------------------------------------------------------------------------------------------------------------------------------------------------------------------------------|------------------|----------------|---------------|----------------------|-----------------|-----------|-------|----------|-----------|
| Berg (2015)      | Cigarette users' interest in using or switching to electronic nicotine delivery systems for smokeless tobacco for harm reduction, cessation, or novelty: a cross-sectional survey of US adults. |                  |                |               | X                    |                 |           |       |          |           |
| Berg (2016)      | DECOY: Documenting Experiences with Cigarettes and Other Tobacco in Young Adults.                                                                                                               |                  |                |               |                      | X               |           |       |          |           |
| Berg (2016)      | Preferred flavors and reasons for e-cigarette use and discontinued use among never, current, and former smokers.                                                                                |                  |                |               | X                    | X               |           |       |          |           |
| Bertholon (2013) | [Comparison of the aerosol produced by electronic cigarettes with conventional cigarettes and the shisha].                                                                                      | X                |                |               |                      |                 |           |       |          |           |
| Best (2016)      | Relationship between e-cigarette point of sale recall and e-cigarette use in secondary school children: a cross-sectional study.                                                                |                  |                |               |                      |                 | X         |       |          |           |
| Best (2016)      | Does exposure to cigarette brands increase the likelihood of adolescent e-cigarette use? A cross-sectional study.                                                                               |                  |                |               | X                    | X               |           |       |          |           |
| Biener (2015)    | A longitudinal study of electronic cigarette use among a population-based sample of adult smokers: association with smoking cessation and motivation to quit.                                   |                  |                |               |                      | X               |           |       |          | X         |
| Biener (2015)    | Electronic Cigarette Trial and Use among Young Adults: Reasons for Trial and Cessation of Vaping.                                                                                               |                  |                |               | X                    | X               |           |       |          |           |
| Blaser (2015)    | Experts' consensus on use of electronic cigarettes: a Delphi survey from Switzerland.                                                                                                           |                  |                |               |                      |                 |           |       | X        |           |
| Bostean (2015)   | E-Cigarette Use Among Never-Smoking California Students.                                                                                                                                        |                  |                |               |                      | X               |           |       |          |           |
| Bowker (2015)    | Understanding Pregnant Smokers' Adherence to Nicotine Replacement Therapy During a Quit Attempt: A Qualitative Study.                                                                           |                  |                |               | X                    | X               |           |       |          |           |
| Boyers (2014)    | US campus and university debit card policies regarding tobacco and electronic cigarettes.                                                                                                       |                  |                |               |                      |                 |           |       | X        |           |
| Boyle (2015)     | Tobacco Use among Minnesota Adults, 2014.                                                                                                                                                       |                  |                |               |                      | X               |           |       |          |           |
| Brose (2015)     | Perceived relative harm of electronic cigarettes over time and impact on subsequent use. A survey with 1-year and 2-year follow-ups.                                                            |                  |                |               | X                    | X               |           |       |          |           |
| Brose (2015)     | Is the use of electronic cigarettes while smoking associated with smoking cessation attempts,                                                                                                   |                  |                |               |                      | X               |           |       |          | X         |

**Appendix**  
**Overview of Electronic Nicotine Delivery Systems: A Systematic Review**  
**Glasser et al.**

|                         |                                                                                                                                                                        | Product features | Health effects | Addictiveness | Consumer perceptions | Patterns of use | Marketing | Sales | Policies | Cessation |
|-------------------------|------------------------------------------------------------------------------------------------------------------------------------------------------------------------|------------------|----------------|---------------|----------------------|-----------------|-----------|-------|----------|-----------|
|                         | cessation and reduced cigarette consumption? A survey with a 1-year follow-up.                                                                                         |                  |                |               |                      |                 |           |       |          |           |
| Brown (2014)            | Prevalence and characteristics of e-cigarette users in Great Britain: Findings from a general population survey of smokers.                                            |                  |                |               | X                    | X               |           |       |          |           |
| Brown (2014)            | Real-world effectiveness of e-cigarettes when used to aid smoking cessation: a cross-sectional population study.                                                       |                  |                |               |                      |                 |           |       |          | X         |
| Buettner-Schmidt (2016) | Electronic Cigarette Refill Liquids: Child-Resistant Packaging, Nicotine Content, and Sales to Minors.                                                                 | X                |                |               |                      |                 |           |       |          |           |
| Bullen (2010)           | Effect of an electronic nicotine delivery device (e cigarette) on desire to smoke and withdrawal, user preferences and nicotine delivery: randomised cross-over trial. |                  | X              | X             |                      |                 |           |       |          |           |
| Bullen (2013)           | Electronic cigarettes for smoking cessation: a randomised controlled trial.                                                                                            |                  |                |               |                      |                 |           |       |          | X         |
| Bunnell (2015)          | Intentions to smoke cigarettes among never-smoking US middle and high school electronic cigarette users: National Youth Tobacco Survey, 2011-2013.                     |                  |                |               |                      | X               |           |       |          |           |
| Buonocore (2016)        | Labelling of electronic cigarettes: regulations and current practice.                                                                                                  |                  |                |               |                      |                 |           |       | X        |           |
| Busch (2016)            | Prevalence, Reasons for Use, and Risk Perception of Electronic Cigarettes Among Post-Acute Coronary Syndrome Smokers.                                                  |                  |                |               | X                    |                 |           |       |          | X         |
| Bush (2015)             | A pilot study on nicotine residues in houses of electronic cigarette users, tobacco smokers, and non-users of nicotine-containing products.                            | X                |                |               |                      |                 |           |       |          |           |
| Butler (2015)           | Polytobacco Use Among College Students.                                                                                                                                |                  |                |               |                      | X               |           |       |          |           |
| Cahn (2013)             | France acts on electronic cigarettes.                                                                                                                                  |                  |                |               |                      |                 |           |       | X        |           |
| Camenga (2014)          | Trends in use of electronic nicotine delivery systems by adolescents.                                                                                                  |                  |                |               |                      | X               |           |       |          |           |
| Camenga (2014)          | Alternate tobacco product and drug use among adolescents who use electronic cigarettes, cigarettes only, and never smokers.                                            |                  |                |               |                      | X               |           |       |          |           |
| Camenga (2015)          | Adolescents' and Young Adults' Perceptions of Electronic Cigarettes for Smoking Cessation: A Focus Group Study.                                                        |                  |                |               | X                    |                 |           |       |          |           |

**Appendix  
Overview of Electronic Nicotine Delivery Systems: A Systematic Review  
Glasser et al.**

|                                                         |                                                                                                                                                    | Product features | Health effects | Addictiveness | Consumer perceptions | Patterns of use | Marketing | Sales | Policies | Cessation |
|---------------------------------------------------------|----------------------------------------------------------------------------------------------------------------------------------------------------|------------------|----------------|---------------|----------------------|-----------------|-----------|-------|----------|-----------|
| Cameron (2013)                                          | Variable and potentially fatal amounts of nicotine in e-cigarette nicotine solutions.                                                              | X                |                |               |                      |                 |           |       |          |           |
| Camus (2014)                                            | Ulcerative colitis and electronic cigarette: what's the matter?                                                                                    |                  | X              |               |                      |                 |           |       |          |           |
| Cantrell (2014)                                         | Adverse effects of e-cigarette exposures.                                                                                                          |                  | X              |               |                      |                 |           |       |          |           |
| Cantrell (2016)                                         | Rapid increase in e-cigarette advertising spending as Altria's MarkTen enters the marketplace.                                                     |                  |                |               |                      |                 | X         |       |          |           |
| Capasso (2014)                                          | E-cigarette regulations in Italy: fluctuating and confusing.                                                                                       |                  |                |               |                      |                 |           |       | X        |           |
| Caponnetto (2011)                                       | Successful smoking cessation with electronic cigarettes in smokers with a documented history of recurring relapses: a case series.                 |                  |                |               |                      |                 |           |       |          | X         |
| Caponnetto (2013)                                       | Impact of an electronic cigarette on smoking reduction and cessation in schizophrenic smokers: a prospective 12-month pilot study.                 |                  | X              |               |                      |                 |           |       |          | X         |
| Caponnetto (2013)                                       | Efficiency and Safety of an eLectronic cigAreTte (ECLAT) as tobacco cigarettes substitute: a prospective 12-month randomized control design study. |                  | X              |               |                      | X               |           |       |          | X         |
| Caraballo (2016)                                        | Electronic Nicotine Delivery System Use Among U.S. Adults, 2014.                                                                                   |                  |                |               |                      | X               |           |       |          |           |
| Cardenas (2015)                                         | The smoking habits of the family influence the uptake of e-cigarettes in US children.                                                              |                  |                |               | X                    | X               |           |       |          |           |
| Cardenas (2016)                                         | Use of electronic nicotine delivery systems and recent initiation of smoking among US youth.                                                       |                  |                |               |                      | X               |           |       |          |           |
| Carnevale (2016)                                        | Acute impact of tobacco versus electronic cigarette smoking on oxidative stress and vascular function.                                             |                  | X              |               |                      |                 |           |       |          |           |
| Case (2016)                                             | Formative Research to Identify Perceptions of E-cigarettes in College Students: Implications for Future Health Communication Campaigns.            |                  |                |               | X                    |                 |           |       |          |           |
| Cataldo (2015)                                          | E-cigarette marketing and older smokers: road to renormalization.                                                                                  |                  |                |               | X                    |                 | X         |       |          |           |
| Corey (2013)                                            | Notes from the field: electronic cigarette use among middle and high school students - United States, 2011-2012.                                   |                  |                |               |                      | X               |           |       |          |           |
| Centers for Disease Control and Prevention (CDC) (2013) | Tobacco product use among middle and high school students--United States, 2011 and 2012.                                                           |                  |                |               |                      | X               |           |       |          |           |



**Appendix**  
**Overview of Electronic Nicotine Delivery Systems: A Systematic Review**  
**Glasser et al.**

|                         |                                                                                                                                           | Product features | Health effects | Addictiveness | Consumer perceptions | Patterns of use | Marketing | Sales | Policies | Cessation |
|-------------------------|-------------------------------------------------------------------------------------------------------------------------------------------|------------------|----------------|---------------|----------------------|-----------------|-----------|-------|----------|-----------|
| Cervellati (2014)       | Comparative effects between electronic and cigarette smoke in human keratinocytes and epithelial lung cells.                              |                  | X              |               |                      |                 |           |       |          |           |
| Chaffee (2015)          | Conditional risk assessment of adolescents' electronic cigarette perceptions.                                                             |                  |                |               | X                    |                 |           |       |          |           |
| Chatham-Stephens (2014) | Notes from the field: calls to poison centers for exposures to electronic cigarettes--United States, September 2010-February 2014.        |                  | X              |               |                      |                 |           |       |          |           |
| Cheah (2014)            | Electronic nicotine delivery systems: regulatory and safety challenges: Singapore perspective.                                            | X                |                |               |                      |                 | X         |       |          |           |
| Chen (2013)             | FDA summary of adverse events on electronic cigarettes.                                                                                   |                  | X              |               |                      |                 |           |       |          |           |
| Chen (2015)             | Death following intentional ingestion of e-liquid.                                                                                        |                  | X              |               |                      |                 |           |       |          |           |
| Chen (2015)             | What Online Communities Can Tell Us About Electronic Cigarettes and Hookah Use: A Study Using Text Mining and Visualization Techniques.   |                  |                |               | X                    |                 |           |       |          |           |
| Chen (2016)             | E-Cigarette Design Preference and Smoking Cessation: A U.S. Population Study.                                                             |                  |                | X             | X                    | X               |           |       |          |           |
| Cheney (2015)           | Vapor Store Owner Beliefs and Messages to Customers.                                                                                      |                  |                |               | X                    |                 |           |       |          |           |
| Cheney (2016)           | Electronic Cigarette Use in Straight-to-Work Young Adults.                                                                                |                  |                |               | X                    |                 |           |       |          |           |
| Cherng (2016)           | Modeling the Effects of E-Cigarettes on Smoking Behavior: Implications for Future Adult Smoking Prevalence.                               |                  |                |               |                      | X               |           |       |          |           |
| Cho (2011)              | Electronic-cigarette smoking experience among adolescents.                                                                                |                  |                |               | X                    | X               |           |       |          |           |
| Cho (2016)              | Association between Electronic Cigarette Use and Asthma among High School Students in South Korea.                                        |                  |                |               |                      | X               |           |       |          | X         |
| Choi (2012)             | Young adults' favorable perceptions of snus, dissolvable tobacco products, and electronic cigarettes: findings from a focus group study.  |                  |                |               | X                    |                 |           |       |          |           |
| Choi (2013)             | Characteristics associated with awareness, perceptions, and use of electronic nicotine delivery systems among young US Midwestern adults. |                  |                |               | X                    | X               |           |       |          |           |

**Appendix**  
**Overview of Electronic Nicotine Delivery Systems: A Systematic Review**  
**Glasser et al.**

|                    |                                                                                                                                                                      | Product features | Health effects | Addictiveness | Consumer perceptions | Patterns of use | Marketing | Sales | Policies | Cessation |
|--------------------|----------------------------------------------------------------------------------------------------------------------------------------------------------------------|------------------|----------------|---------------|----------------------|-----------------|-----------|-------|----------|-----------|
| Choi (2014)        | Beliefs and experimentation with electronic cigarettes: a prospective analysis among young adults.                                                                   |                  |                |               | X                    | X               |           |       |          |           |
| Choi (2016)        | E-Cigarette Use Among Florida Youth With and Without Asthma.                                                                                                         |                  |                |               |                      | X               |           |       |          |           |
| Choi, (2014)       | Authors' response                                                                                                                                                    |                  |                |               |                      | X               |           |       |          | X         |
| Christensen (2014) | Profile of e-cigarette use and its relationship with cigarette quit attempts and abstinence in Kansas adults.                                                        |                  |                |               |                      |                 |           |       |          | X         |
| Chu (2015)         | Diffusion of Messages from an Electronic Cigarette Brand to Potential Users through Twitter.                                                                         |                  |                |               |                      |                 | X         |       |          |           |
| Chu (2015)         | How different countries addressed the sudden growth of e-cigarettes in an online tobacco control community.                                                          |                  |                |               | X                    |                 |           |       |          |           |
| Cobb (2010)        | Novel nicotine delivery systems and public health: the rise of the "e-cigarette".                                                                                    | X                |                |               |                      |                 |           |       |          |           |
| Cobb (2015)        | Forensic analysis of online marketing for electronic nicotine delivery systems.                                                                                      |                  |                |               |                      |                 | X         |       |          |           |
| Cohn (2015)        | The association between alcohol, marijuana use, and new and emerging tobacco products in a young adult population.                                                   |                  |                |               |                      | X               |           |       |          |           |
| Cole-Lewis (2015)  | Social Listening: A Content Analysis of E-Cigarette Discussions on Twitter.                                                                                          |                  |                |               |                      |                 | X         |       |          |           |
| Coleman (2015)     | Association between electronic cigarette use and openness to cigarette smoking among US young adults.                                                                |                  |                |               |                      | X               |           |       |          |           |
| Coleman (2016)     | "It's not smoke. It's not tar. It's not 4000 chemicals. Case closed": Exploring attitudes, beliefs, and perceived social norms of e-cigarette use among adult users. |                  |                |               | X                    |                 |           |       |          |           |
| Cooke (2015)       | Acute inhalation of vaporized nicotine increases arterial pressure in young non-smokers: a pilot study.                                                              |                  | X              |               |                      |                 |           |       |          |           |
| Cooper (2015)      | E-cigarette use among Texas youth: Results from the 2014 Texas Youth Tobacco Survey.                                                                                 |                  |                |               |                      | X               |           |       |          |           |
| Cooper (2016)      | E-cigarette Dual Users, Exclusive Users and Perceptions of Tobacco Products.                                                                                         |                  |                |               | X                    | X               |           |       |          |           |

**Appendix**  
**Overview of Electronic Nicotine Delivery Systems: A Systematic Review**  
**Glasser et al.**

|                    |                                                                                                                                            | Product features | Health effects | Addictiveness | Consumer perceptions | Patterns of use | Marketing | Sales | Policies | Cessation |
|--------------------|--------------------------------------------------------------------------------------------------------------------------------------------|------------------|----------------|---------------|----------------------|-----------------|-----------|-------|----------|-----------|
| Cooper (2016)      | A Qualitative Approach to Understanding Real-World Electronic Cigarette Use: Implications for Measurement and Regulation.                  |                  |                |               | X                    | X               |           |       |          |           |
| Copp (2015)        | The effects of nicotine stimulus and response expectancies on male and female smokers' responses to nicotine-free electronic cigarettes.   |                  |                | X             | X                    |                 |           |       |          | X         |
| Corey (2015)       | Flavored Tobacco Product Use Among Middle and High School Students--United States, 2014.                                                   |                  |                |               |                      | X               |           |       |          |           |
| Corsi (2016)       | An examination of the shift in school-level clustering of US adolescent electronic cigarette use and its multilevel correlates, 2011-2013. |                  |                |               |                      | X               |           |       |          |           |
| Cranwell (2014)    | Adolescents' exposure to tobacco and alcohol content in YouTube music videos.                                                              |                  |                |               |                      |                 | X         |       |          |           |
| Cummins (2014)     | Use of e-cigarettes by individuals with mental health conditions.                                                                          |                  |                |               |                      | X               |           |       |          |           |
| Cummins (2016)     | Knowledge and beliefs about electronic cigarettes among quitline cessation staff.                                                          |                  |                |               | X                    |                 |           |       | X        |           |
| Cuomo (2015)       | Pricing and sales tax collection policies for e-cigarette starter kits and disposable products sold online.                                |                  |                |               |                      |                 |           | X     |          |           |
| Czogala (2014)     | Secondhand exposure to vapors from electronic cigarettes.                                                                                  | X                |                |               |                      |                 |           |       |          |           |
| Czoli (2014)       | Electronic cigarettes in Canada: prevalence of use and perceptions among youth and young adults.                                           |                  |                |               | X                    | X               |           |       |          |           |
| Czoli (2015)       | Use of Conventional and Alternative Tobacco and Nicotine Products Among a Sample of Canadian Youth.                                        |                  |                |               |                      | X               |           |       |          |           |
| Czoli (2016)       | Consumer preferences for electronic cigarettes: results from a discrete choice experiment.                                                 |                  |                | X             | X                    |                 |           |       |          |           |
| Dai (2016)         | Mining social media data for opinion polarities about electronic cigarettes.                                                               |                  |                |               |                      |                 | X         |       |          |           |
| Dautzenberg (2015) | Factors associated with experimentation of electronic cigarettes among Parisian teenagers in 2013.                                         |                  |                |               |                      | X               |           |       |          |           |
| Davis (2015)       | Nicotine concentrations in electronic cigarette refill and do-it-yourself fluids.                                                          | X                |                |               |                      |                 |           |       |          |           |
| Davis (2015)       | Unexpected nicotine in Do-it-Yourself electronic cigarette flavourings.                                                                    | X                |                |               |                      |                 |           |       |          |           |
| Dawkins (2012)     | The electronic-cigarette: effects on desire to smoke, withdrawal symptoms and cognition.                                                   |                  | X              | X             |                      |                 |           |       |          |           |

**Appendix**  
**Overview of Electronic Nicotine Delivery Systems: A Systematic Review**  
**Glasser et al.**

|                      |                                                                                                                                                                          | Product features | Health effects | Addictiveness | Consumer perceptions | Patterns of use | Marketing | Sales | Policies | Cessation |
|----------------------|--------------------------------------------------------------------------------------------------------------------------------------------------------------------------|------------------|----------------|---------------|----------------------|-----------------|-----------|-------|----------|-----------|
| Dawkins (2013)       | Nicotine derived from the electronic cigarette improves time-based prospective memory in abstinent smokers.                                                              |                  | X              | X             |                      |                 |           |       |          |           |
| Dawkins (2013)       | 'Vaping' profiles and preferences: an online survey of electronic cigarette users.                                                                                       |                  | X              | X             | X                    | X               |           |       |          | X         |
| Dawkins (2014)       | Acute electronic cigarette use: nicotine delivery and subjective effects in regular users.                                                                               |                  | X              | X             |                      |                 |           |       |          |           |
| Dawkins (2015)       | First- versus second-generation electronic cigarettes: predictors of choice and effects on urge to smoke and withdrawal symptoms.                                        |                  |                | X             | X                    |                 |           |       |          |           |
| Dawkins (2016)       | The Effects of E-Cigarette Visual Appearance on Craving and Withdrawal Symptoms in Abstinent Smokers.                                                                    |                  |                | X             |                      | X               |           |       |          |           |
| Dawkins (2016)       | Self-titration by experienced e-cigarette users: blood nicotine delivery and subjective effects.                                                                         |                  | X              | X             |                      | X               |           |       |          |           |
| de Andrade (2015)    | Teenage perceptions of electronic cigarettes in Scottish tobacco-education school interventions: co-production and innovative engagement through a pop-up radio project. |                  |                |               | X                    |                 | X         | X     |          |           |
| Delnevo (2015)       | Patterns of Electronic Cigarette Use Among Adults in the United States.                                                                                                  |                  |                |               |                      | X               |           |       |          |           |
| Delnevo (2015)       | The influence of menthol, e-cigarettes and other tobacco products on young adults' self-reported changes in past year smoking.                                           |                  |                |               |                      | X               |           |       |          |           |
| Dicpinigaitis (2016) | EFFECT OF ELECTRONIC CIGARETTE USE ON COUGH REFLEX SENSITIVITY.                                                                                                          |                  | X              |               |                      |                 |           |       |          |           |
| Dicpinigaitis (2016) | Effect of Electronic Cigarette Use on the Urge-to-Cough Sensation.                                                                                                       |                  | X              |               |                      |                 |           |       |          |           |
| Dobbs (2016)         | 2015 Legislative Update of E-Cigarette Youth Access and Exposure Laws.                                                                                                   |                  |                |               |                      |                 |           |       | X        |           |
| Dockrell (2013)      | E-cigarettes: prevalence and attitudes in Great Britain.                                                                                                                 |                  |                |               | X                    | X               |           |       |          |           |
| Doran (2016)         | Expectancies for and use of e-cigarettes and hookah among young adult non-daily smokers.                                                                                 |                  |                |               |                      | X               |           |       |          |           |
| Douptcheva (2013)    | Use of electronic cigarettes among young Swiss men.                                                                                                                      |                  |                |               |                      | X               |           |       |          |           |
| D'Ruiz (2015)        | Nicotine delivery, tolerability and reduction of smoking urge in smokers following short-term use of one brand of electronic cigarettes.                                 |                  | X              | X             |                      |                 |           |       |          |           |

**Appendix**  
**Overview of Electronic Nicotine Delivery Systems: A Systematic Review**  
**Glasser et al.**

|                   |                                                                                                                                   | Product features | Health effects | Addictiveness | Consumer perceptions | Patterns of use | Marketing | Sales | Policies | Cessation |
|-------------------|-----------------------------------------------------------------------------------------------------------------------------------|------------------|----------------|---------------|----------------------|-----------------|-----------|-------|----------|-----------|
| Duke (2014)       | Exposure to electronic cigarette television advertisements among youth and young adults.                                          |                  |                |               |                      |                 | X         |       |          |           |
| Duke (2015)       | Exploring Differences in Youth Perceptions of the Effectiveness of Electronic Cigarette Television Advertisements.                |                  |                |               |                      |                 | X         |       |          |           |
| Dunlop (2016)     | How are tobacco smokers using e-cigarettes? Patterns of use, reasons for use and places of purchase in New South Wales.           |                  |                |               | X                    | X               |           | X     |          |           |
| Durmowicz (2016)  | Electronic cigarettes: analysis of FDA adverse experience reports in non-users.                                                   |                  | X              |               |                      |                 |           |       |          |           |
| Dutra (2014)      | Electronic cigarettes and conventional cigarette use among U.S. adolescents: a cross-sectional study.                             |                  |                |               |                      | X               |           |       |          | X         |
| Eadie (2015)      | E-cigarette marketing in UK stores: an observational audit and retailers' views.                                                  |                  |                |               | X                    |                 | X         | X     |          |           |
| Eastwood (2015)   | Electronic cigarette use in young people in Great Britain 2013-2014.                                                              |                  |                |               | X                    | X               |           |       |          |           |
| Eberlein (2014)   | Suicide attempt by poisoning using nicotine liquid for use in electronic cigarettes.                                              |                  | X              |               |                      |                 |           |       |          |           |
| Eissenberg (2010) | Electronic nicotine delivery devices: ineffective nicotine delivery and craving suppression after acute administration.           |                  | X              | X             |                      |                 |           |       |          |           |
| El Golli (2016)   | Impact of electronic-cigarette refill liquid on rat testis.                                                                       |                  | X              |               |                      |                 |           |       |          |           |
| El Golli (2016)   | Comparison between electronic cigarette refill liquid and nicotine on metabolic parameters in rats.                               |                  | X              |               |                      |                 |           |       |          |           |
| El-Hellani (2015) | Free-Base and Protonated Nicotine in Electronic Cigarette Liquids and Aerosols.                                                   | X                |                |               |                      |                 |           |       |          |           |
| El-Shahawy (2016) | Primary Care Physicians' Beliefs and Practices Regarding E-Cigarette Use by Patients Who Smoke: A Qualitative Assessment.         |                  |                |               | X                    |                 |           |       |          |           |
| Emery (2014)      | Wanna know about vaping? Patterns of message exposure, seeking and sharing information about e-cigarettes across media platforms. |                  |                |               | X                    |                 | X         |       |          |           |
| Emory (2015)      | Intragroup Variance in Lesbian, Gay, and Bisexual Tobacco Use Behaviors: Evidence That Subgroups Matter, Notably Bisexual Women.  |                  |                |               |                      | X               |           |       |          |           |

**Appendix  
Overview of Electronic Nicotine Delivery Systems: A Systematic Review  
Glasser et al.**

|                                 |                                                                                                                                                                                                                                                 | Product features | Health effects | Addictiveness | Consumer perceptions | Patterns of use | Marketing | Sales | Policies | Cessation |
|---------------------------------|-------------------------------------------------------------------------------------------------------------------------------------------------------------------------------------------------------------------------------------------------|------------------|----------------|---------------|----------------------|-----------------|-----------|-------|----------|-----------|
| England (2014)                  | Screening practices and attitudes of obstetricians-gynecologists toward new and emerging tobacco products.                                                                                                                                      |                  |                |               | X                    |                 |           |       |          |           |
| Erickson (2014)                 | Latent classes of young adults based on use of multiple types of tobacco and nicotine products.                                                                                                                                                 |                  |                |               |                      | X               |           |       |          |           |
| Erratum: Borderud SP,... (2015) | Erratum: Borderud SP, Li Y, Burkhalter JE, Sheffer CE and Ostroff JS. Electronic cigarette use among patients with cancer: Characteristics of electronic cigarette users and their smoking cessation outcomes. Cancer. doi: 10.1002/cncr.28811. |                  |                |               |                      |                 |           |       |          | X         |
| Etter (2010)                    | Electronic cigarettes: a survey of users.                                                                                                                                                                                                       |                  |                |               | X                    | X               |           |       |          |           |
| Etter (2011)                    | Saliva cotinine levels in users of electronic cigarettes.                                                                                                                                                                                       |                  | X              | X             |                      |                 |           |       |          |           |
| Etter (2011)                    | Electronic cigarette: users profile, utilization, satisfaction and perceived efficacy.                                                                                                                                                          |                  |                |               | X                    | X               |           |       |          |           |
| Etter (2013)                    | Analysis of refill liquids for electronic cigarettes.                                                                                                                                                                                           | X                |                |               |                      |                 |           |       |          |           |
| Etter (2014)                    | A longitudinal study of electronic cigarette users.                                                                                                                                                                                             |                  |                |               |                      | X               |           |       |          | X         |
| Etter (2014)                    | Levels of saliva cotinine in electronic cigarette users.                                                                                                                                                                                        |                  | X              | X             |                      |                 |           |       |          |           |
| Etter (2015)                    | Dependence levels in users of electronic cigarettes, nicotine gums and tobacco cigarettes.                                                                                                                                                      |                  |                | X             |                      |                 |           |       |          |           |
| Etter (2015)                    | Electronic cigarettes and cannabis: an exploratory study.                                                                                                                                                                                       |                  |                |               |                      | X               |           |       |          |           |
| Etter (2015)                    | Explaining the effects of electronic cigarettes on craving for tobacco in recent quitters.                                                                                                                                                      |                  |                | X             | X                    | X               |           |       |          |           |
| Etter (2016)                    | Characteristics of users and usage of different types of electronic cigarettes: findings from an online survey.                                                                                                                                 |                  |                |               |                      | X               |           |       |          | X         |
| Etter (2016)                    | Throat hit in users of the electronic cigarette: An exploratory study.                                                                                                                                                                          |                  |                | X             |                      |                 |           |       |          |           |
| Etter (2016)                    | A longitudinal study of cotinine in long-term daily users of e-cigarettes.                                                                                                                                                                      |                  |                | X             |                      |                 |           |       |          |           |
| Eversman (2015)                 | Harm reduction in U.S. tobacco control: Constructions in textual news media.                                                                                                                                                                    |                  |                |               | X                    |                 |           |       |          |           |
| Faletau (2013)                  | Looks like smoking, is it smoking?: children's perceptions of cigarette-like nicotine delivery systems, smoking and cessation.                                                                                                                  |                  |                |               | X                    |                 |           |       |          |           |

**Appendix  
Overview of Electronic Nicotine Delivery Systems: A Systematic Review  
Glasser et al.**

|                   |                                                                                                                                                                                                         | Product features | Health effects | Addictiveness | Consumer perceptions | Patterns of use | Marketing | Sales | Policies | Cessation |
|-------------------|---------------------------------------------------------------------------------------------------------------------------------------------------------------------------------------------------------|------------------|----------------|---------------|----------------------|-----------------|-----------|-------|----------|-----------|
| Fallin (2016)     | Perceptions of Electronic Cigarettes Among Medicaid-Eligible Pregnant and Postpartum Women.                                                                                                             |                  |                |               | X                    |                 |           |       |          |           |
| Farquhar (2015)   | Demystifying electronic cigarette use in pregnancy.                                                                                                                                                     |                  |                |               | X                    |                 |           |       |          |           |
| Farrelly (2015)   | A Randomized Trial of the Effect of E-cigarette TV Advertisements on Intentions to Use E-cigarettes.                                                                                                    |                  |                |               |                      |                 | X         |       |          |           |
| Farrimond (2016)  | E-cigarette regulation and policy: UK vapers' perspectives.                                                                                                                                             |                  |                |               |                      |                 |           |       | X        |           |
| Farsalinos (2013) | Chronic idiopathic neutrophilia in a smoker, relieved after smoking cessation with the use of electronic cigarette: a case report.                                                                      |                  | X              |               |                      |                 |           |       |          |           |
| Farsalinos (2013) | Evaluating nicotine levels selection and patterns of electronic cigarette use in a group of "vapers" who had achieved complete substitution of smoking.                                                 |                  |                |               |                      |                 |           |       |          | X         |
| Farsalinos (2013) | Evaluation of electronic cigarette use (vaping) topography and estimation of liquid consumption: implications for research protocol standards definition and for public health authorities' regulation. |                  |                |               |                      | X               |           |       |          |           |
| Farsalinos (2013) | Impact of flavour variability on electronic cigarette use experience: an internet survey.                                                                                                               |                  |                |               |                      | X               |           |       |          | X         |
| Farsalinos (2013) | Comparison of the cytotoxic potential of cigarette smoke and electronic cigarette vapour extract on cultured myocardial cells.                                                                          |                  | X              |               |                      |                 |           |       |          |           |
| Farsalinos (2014) | Characteristics, perceived side effects and benefits of electronic cigarette use: a worldwide survey of more than 19,000 consumers.                                                                     |                  | X              |               | X                    |                 |           |       |          |           |
| Farsalinos (2014) | Nicotine absorption from electronic cigarette use: comparison between first and new-generation devices.                                                                                                 |                  |                | X             |                      |                 |           |       |          |           |
| Farsalinos (2015) | Evaluation of electronic cigarette liquids and aerosol for the presence of selected inhalation toxins.                                                                                                  | X                |                |               |                      |                 |           |       |          |           |
| Farsalinos (2014) | Acute effects of using an electronic nicotine-delivery device (electronic cigarette) on myocardial function: comparison with the effects of regular cigarettes.                                         |                  | X              |               |                      |                 |           |       |          |           |

**Appendix**  
**Overview of Electronic Nicotine Delivery Systems: A Systematic Review**  
**Glasser et al.**

|                   |                                                                                                                                                                        | Product features | Health effects | Addictiveness | Consumer perceptions | Patterns of use | Marketing | Sales | Policies | Cessation |
|-------------------|------------------------------------------------------------------------------------------------------------------------------------------------------------------------|------------------|----------------|---------------|----------------------|-----------------|-----------|-------|----------|-----------|
| Farsalinos (2015) | Tobacco-Specific Nitrosamines in Electronic Cigarettes: Comparison between Liquid and Aerosol Levels.                                                                  | X                |                |               |                      |                 |           |       |          |           |
| Farsalinos (2015) | Nicotine absorption from electronic cigarette use: comparison between experienced consumers (vapers) and naive users (smokers).                                        |                  |                | X             |                      |                 |           |       |          |           |
| Farsalinos (2015) | Nicotine levels and presence of selected tobacco-derived toxins in tobacco flavoured electronic cigarette refill liquids.                                              | X                |                |               |                      |                 |           |       |          |           |
| Farsalinos (2015) | Factors associated with dual use of tobacco and electronic cigarettes: A case control study.                                                                           |                  |                |               | X                    | X               |           |       |          |           |
| Farsalinos (2015) | E-cigarettes generate high levels of aldehydes only in 'dry puff' conditions.                                                                                          | X                |                |               |                      |                 |           |       |          |           |
| Farsalinos (2016) | Protocol proposal for, and evaluation of, consistency in nicotine delivery from the liquid to the aerosol of electronic cigarettes atomizers: regulatory implications. | X                |                |               |                      |                 |           |       |          |           |
| Farsalinos (2016) | Effect of continuous smoking reduction and abstinence on blood pressure and heart rate in smokers switching to electronic cigarettes.                                  |                  | X              |               |                      |                 |           |       |          |           |
| Fernandez (2015)  | Particulate Matter from Electronic Cigarettes and Conventional Cigarettes: a Systematic Review and Observational Study.                                                | X                |                |               |                      |                 |           |       |          |           |
| Ferrari (2015)    | Short-term effects of a nicotine-free e-cigarette compared to a traditional cigarette in smokers and non-smokers.                                                      |                  | X              |               |                      |                 |           |       |          |           |
| Filippidis (2016) | Two-year trends and predictors of e-cigarette use in 27 European Union member states.                                                                                  |                  |                |               |                      | X               |           |       |          |           |
| Flora (2016)      | Characterization of potential impurities and degradation products in electronic cigarette formulations and aerosols.                                                   | X                |                |               |                      |                 |           |       |          |           |
| Flouris (2012)    | Acute effects of electronic and tobacco cigarette smoking on complete blood count.                                                                                     |                  | X              |               |                      |                 |           |       |          |           |
| Flouris (2013)    | Acute impact of active and passive electronic cigarette smoking on serum cotinine and lung function.                                                                   |                  | X              | X             |                      |                 |           |       |          |           |
| Ford (2016)       | Adolescents' responses to the promotion and flavouring of e-cigarettes.                                                                                                |                  |                |               | X                    | X               | X         |       |          |           |
| Forrester (2015)  | Pediatric Exposures to Electronic Cigarettes Reported to Texas Poison Centers.                                                                                         |                  | X              |               |                      |                 |           |       |          |           |



**Appendix**  
**Overview of Electronic Nicotine Delivery Systems: A Systematic Review**  
**Glasser et al.**

|                      |                                                                                                                                                                        | Product features | Health effects | Addictiveness | Consumer perceptions | Patterns of use | Marketing | Sales | Policies | Cessation |
|----------------------|------------------------------------------------------------------------------------------------------------------------------------------------------------------------|------------------|----------------|---------------|----------------------|-----------------|-----------|-------|----------|-----------|
| Fotiou (2015)        | Prevalence and correlates of electronic cigarette use among adolescents in Greece: A preliminary cross-sectional analysis of nationwide survey data.                   |                  |                |               |                      | X               |           |       |          |           |
| Foulds (2011)        | Electronic cigarettes (e-cigs): views of aficionados and clinical/public health perspectives.                                                                          |                  |                |               | X                    | X               |           |       |          |           |
| Foulds (2015)        | Development of a questionnaire for assessing dependence on electronic cigarettes among a large sample of ex-smoking E-cigarette users.                                 |                  |                | X             | X                    |                 |           |       |          |           |
| Fraser (2015)        | Vapers' perspectives on electronic cigarette regulation in Australia.                                                                                                  |                  |                |               | X                    |                 |           | X     | X        | X         |
| Friedman (2015)      | How does electronic cigarette access affect adolescent smoking?                                                                                                        |                  |                |               |                      |                 |           |       | X        |           |
| Fuoco (2014)         | Influential parameters on particle concentration and size distribution in the mainstream of e-cigarettes.                                                              | X                |                |               |                      |                 |           |       |          |           |
| Gallart-Mateu (2016) | Passive exposure to nicotine from e-cigarettes.                                                                                                                        | X                | X              |               |                      |                 |           |       |          |           |
| Gallus (2014)        | E-cigarette awareness, use, and harm perceptions in Italy: a national representative survey.                                                                           |                  |                |               | X                    | X               |           |       | X        | X         |
| Ganz (2015)          | Electronic cigarette advertising at the point-of-sale: a gap in tobacco control research.                                                                              |                  |                |               |                      |                 | X         |       |          |           |
| Garbutt (2015)       | Parental Use of Electronic Cigarettes.                                                                                                                                 |                  |                |               | X                    |                 |           |       |          |           |
| Garcia-Gomez (2016)  | Real-Time Chemical Analysis of E-Cigarette Aerosols By Means Of Secondary Electrospray Ionization Mass Spectrometry.                                                   | X                |                |               |                      |                 |           |       |          |           |
| Geiss (2014)         | Characterisation of mainstream and passive vapours emitted by selected electronic cigarettes.                                                                          | X                |                |               |                      |                 |           |       |          |           |
| Geiss (2016)         | Correlation of volatile carbonyl yields emitted by e-cigarettes with the temperature of the heating coil and the perceived sensorial quality of the generated vapours. | X                |                |               |                      |                 |           |       |          |           |
| Gillman (2016)       | Effect of variable power levels on the yield of total aerosol mass and formation of aldehydes in e-cigarette aerosols.                                                 | X                |                |               |                      |                 |           |       |          |           |
| Gilreath (2016)      | Patterns of Alternative Tobacco Product Use: Emergence of Hookah and E-cigarettes as Preferred Products Amongst Youth.                                                 |                  |                |               |                      | X               |           |       |          |           |

**Appendix**  
**Overview of Electronic Nicotine Delivery Systems: A Systematic Review**  
**Glasser et al.**

|                  |                                                                                                                               | Product features | Health effects | Addictiveness | Consumer perceptions | Patterns of use | Marketing | Sales | Policies | Cessation |
|------------------|-------------------------------------------------------------------------------------------------------------------------------|------------------|----------------|---------------|----------------------|-----------------|-----------|-------|----------|-----------|
| Giovenco (2014)  | Factors associated with e-cigarette use: a national population survey of current and former smokers.                          |                  |                |               |                      | X               |           |       |          |           |
| Giovenco (2014)  | E-Cigarette Market Trends in Traditional U.S. Retail Channels, 2012-2013.                                                     |                  |                |               |                      |                 |           | X     |          |           |
| Gmel (2016)      | E-cigarette use in young Swiss men: is vaping an effective way of reducing or quitting smoking?                               |                  |                | X             |                      | X               |           |       |          |           |
| Goel (2015)      | Highly Reactive Free Radicals in Electronic Cigarette Aerosols.                                                               | X                |                |               |                      |                 |           |       |          |           |
| Golli (2016)     | Impact of e-cigarette refill liquid exposure on rat kidney.                                                                   |                  | X              |               |                      |                 |           |       |          |           |
| Goniewicz (2012) | Electronic cigarette use among teenagers and young adults in Poland.                                                          |                  |                |               |                      | X               |           |       |          |           |
| Goniewicz (2013) | Nicotine levels in electronic cigarettes.                                                                                     | X                |                |               |                      |                 |           |       |          |           |
| Goniewicz (2013) | Patterns of electronic cigarette use and user beliefs about their safety and benefits: an internet survey.                    |                  |                |               | X                    | X               |           |       |          | X         |
| Goniewicz (2014) | Levels of selected carcinogens and toxicants in vapour from electronic cigarettes.                                            | X                |                |               |                      |                 |           |       |          |           |
| Goniewicz (2014) | Nicotine content of electronic cigarettes, its release in vapour and its consistency across batches: regulatory implications. | X                |                |               |                      |                 |           |       |          |           |
| Goniewicz (2014) | The impact of the 2010 Polish smoke-free legislation on the popularity and sales of electronic cigarettes.                    |                  |                |               |                      |                 |           |       | X        |           |
| Goniewicz (2014) | Rise in electronic cigarette use among adolescents in Poland.                                                                 |                  |                |               |                      | X               |           |       |          |           |
| Goniewicz (2015) | Electronic cigarettes are a source of thirdhand exposure to nicotine.                                                         | X                |                |               |                      |                 |           |       |          |           |
| Goniewicz (2015) | Nicotine levels in electronic cigarette refill solutions: A comparative analysis of products from the US, Korea, and Poland.  | X                |                |               |                      |                 |           |       |          |           |
| Goniewicz (2016) | Dual use of electronic and tobacco cigarettes among adolescents: a cross-sectional study in Poland.                           |                  |                |               | X                    | X               |           |       |          |           |
| Gourdet (2014)   | A baseline understanding of state laws governing e-cigarettes.                                                                |                  |                |               |                      |                 |           |       | X        |           |
| Grace (2015)     | Estimating cross-price elasticity of e-cigarettes using a simulated demand procedure.                                         |                  |                |               |                      |                 |           | X     |          |           |
| Grace (2015)     | Gender differences in satisfaction ratings for nicotine electronic cigarettes by first-time users.                            |                  |                | X             |                      |                 |           |       |          | X         |

**Appendix**  
**Overview of Electronic Nicotine Delivery Systems: A Systematic Review**  
**Glasser et al.**

|                   |                                                                                                                                                                                       | Product features | Health effects | Addictiveness | Consumer perceptions | Patterns of use | Marketing | Sales | Policies | Cessation |
|-------------------|---------------------------------------------------------------------------------------------------------------------------------------------------------------------------------------|------------------|----------------|---------------|----------------------|-----------------|-----------|-------|----------|-----------|
| Grana (2014)      | "Smoking revolution": a content analysis of electronic cigarette retail websites.                                                                                                     |                  |                |               |                      |                 | X         |       |          |           |
| Grana (2014)      | A longitudinal analysis of electronic cigarette use and smoking cessation.                                                                                                            |                  |                |               |                      |                 |           |       |          | X         |
| Gravelly (2014)   | Awareness, trial, and current use of electronic cigarettes in 10 countries: Findings from the ITC project.                                                                            |                  |                |               | X                    | X               |           |       |          |           |
| Guillet (2015)    | Electronic cigarette: use and perceptions among French military nurses in 2013.                                                                                                       |                  |                |               | X                    | X               |           |       |          |           |
| Gupta (2014)      | Accidental nicotine liquid ingestion: emerging paediatric problem.                                                                                                                    |                  | X              |               |                      |                 |           |       |          |           |
| Haber (2014)      | Clearing the air: inpatient providers' knowledge, perspectives, and experience with electronic cigarettes.                                                                            |                  |                |               | X                    |                 |           |       | X        |           |
| Hadwiger (2010)   | Identification of amino-tadalafil and rimonabant in electronic cigarette products using high pressure liquid chromatography with diode array and tandem mass spectrometric detection. | X                |                |               |                      |                 |           |       |          |           |
| Hahn (2014)       | Electronic cigarettes: overview of chemical composition and exposure estimation.                                                                                                      | X                |                |               |                      |                 |           |       |          |           |
| Hahn (2015)       | Electronic Cigarette Retail Outlets and Proximity to Schools.                                                                                                                         |                  |                |               |                      |                 |           | X     |          |           |
| Hajek (2015)      | Nicotine intake from electronic cigarettes on initial use and after 4 weeks of regular use.                                                                                           |                  | X              |               |                      |                 |           |       |          |           |
| Hall (2014)       | Should Australia reconsider its ban on the sale of electronic nicotine delivery systems?                                                                                              |                  |                |               |                      |                 |           |       | X        |           |
| Hamilton (2014)   | Ever Use of Nicotine and Nonnicotine Electronic Cigarettes Among High School Students in Ontario, Canada.                                                                             |                  |                |               | X                    | X               |           |       |          |           |
| Hammal (2016)     | Exploring Attitudes of Children 12-17 Years of Age Toward Electronic Cigarettes.                                                                                                      |                  |                |               | X                    |                 | X         |       |          |           |
| Hammond (2015)    | Retail availability and marketing of electronic cigarettes in Canada.                                                                                                                 |                  |                |               |                      |                 | X         | X     |          |           |
| Hampson (2015)    | Prospective Predictors of Novel Tobacco and Nicotine Product Use in Emerging Adulthood.                                                                                               |                  |                |               |                      | X               |           |       |          |           |
| Han (2015)        | Levels of Selected Groups of Compounds in Refill Solutions for Electronic Cigarettes.                                                                                                 | X                |                |               |                      |                 |           |       |          |           |
| Hanewinkel (2015) | Risk factors for e-cigarette, conventional cigarette, and dual use in German adolescents: A cohort study.                                                                             |                  |                |               |                      | X               |           |       |          |           |

**Appendix**  
**Overview of Electronic Nicotine Delivery Systems: A Systematic Review**  
**Glasser et al.**

|                    |                                                                                                                                             | Product features | Health effects | Addictiveness | Consumer perceptions | Patterns of use | Marketing | Sales | Policies | Cessation |
|--------------------|---------------------------------------------------------------------------------------------------------------------------------------------|------------------|----------------|---------------|----------------------|-----------------|-----------|-------|----------|-----------|
| Harrell (2015)     | Expectancies for cigarettes, e-cigarettes, and nicotine replacement therapies among e-cigarette users (aka vapers).                         |                  |                | X             | X                    | X               |           |       |          |           |
| Harrell (2015)     | E-cigarettes and expectancies: why do some users keep smoking?                                                                              |                  |                |               | X                    | X               |           |       |          | X         |
| Harrington (2014)  | Electronic cigarette awareness, use history, and expected future use among hospitalized cigarette smokers.                                  |                  |                |               | X                    | X               |           |       |          |           |
| Harris (2014)      | Tweeting for and against public health policy: response to the Chicago Department of Public Health's electronic cigarette Twitter campaign. |                  |                |               |                      |                 |           |       | X        |           |
| Harrold (2015)     | Prevalence of e-cigarette users in New South Wales.                                                                                         |                  |                |               |                      | X               |           |       |          |           |
| Hecht (2015)       | Evaluation of toxicant and carcinogen metabolites in the urine of e-cigarette users versus cigarette smokers.                               |                  | X              |               |                      |                 |           |       |          |           |
| Hefner (2016)      | E-cigarette Use in Veterans Seeking Mental Health and/or Substance Use Services.                                                            |                  |                |               | X                    | X               |           |       |          |           |
| Hendricks (2015)   | Hospitalized smokers' expectancies for electronic cigarettes versus tobacco cigarettes.                                                     |                  |                |               | X                    | X               |           |       |          |           |
| Herrington (2015)  | Electronic cigarette solutions and resultant aerosol profiles.                                                                              | X                |                |               |                      |                 |           |       |          |           |
| Hershberger (2015) | Combined expectancies of alcohol and e-cigarette use relate to higher alcohol use.                                                          |                  |                |               |                      | X               |           |       |          |           |
| Heydari (2015)     | Assessment of Different Quit Smoking Methods Selected by Patients in Tobacco Cessation Centers in Iran.                                     |                  |                |               |                      | X               |           |       |          | X         |
| Higham (2016)      | Electronic cigarette exposure triggers neutrophil inflammatory responses.                                                                   |                  | X              |               |                      |                 |           |       |          |           |
| Hiratsuka (2015)   | Views on electronic cigarette use in tobacco screening and cessation in an Alaska Native healthcare setting.                                |                  |                |               | X                    |                 |           |       |          |           |
| Hiscock (2014)     | E-cigarettes: online survey of UK smoking cessation practitioners.                                                                          |                  |                |               | X                    |                 |           |       | X        |           |
| Hiscock (2015)     | Views from the Coalface: What Do English Stop Smoking Service Personnel Think about E-Cigarettes?                                           |                  |                |               | X                    |                 |           |       |          | X         |
| Hitchman (2015)    | Associations Between E-Cigarette Type, Frequency of Use, and Quitting Smoking:                                                              |                  |                |               |                      | X               |           |       |          | X         |

**Appendix**  
**Overview of Electronic Nicotine Delivery Systems: A Systematic Review**  
**Glasser et al.**

|               |                                                                                                                                                                          | Product features | Health effects | Addictiveness | Consumer perceptions | Patterns of use | Marketing | Sales | Policies | Cessation |
|---------------|--------------------------------------------------------------------------------------------------------------------------------------------------------------------------|------------------|----------------|---------------|----------------------|-----------------|-----------|-------|----------|-----------|
|               | Findings From a Longitudinal Online Panel Survey in Great Britain.                                                                                                       |                  |                |               |                      |                 |           |       |          |           |
| Hom (2016)    | Platelet activation, adhesion, inflammation, and aggregation potential are altered in the presence of electronic cigarette extracts of variable nicotine concentrations. |                  | X              |               |                      |                 |           |       |          |           |
| Hosler (2016) | Longitudinal Trends in Tobacco Availability, Tobacco Advertising, and Ownership Changes of Food Stores, Albany, New York, 2003-2015.                                     |                  |                |               |                      |                 | X         | X     |          |           |
| Howard (2016) | A New Source for Nicotine Exposures in Pediatric Patients: Electronic Cigarettes.                                                                                        |                  | X              |               |                      |                 |           |       |          |           |
| Hsu (2013)    | An observational study of retail availability and in-store marketing of e-cigarettes in London: potential to undermine recent tobacco control gains?                     |                  |                |               |                      |                 | X         | X     |          |           |
| Hua (2013)    | Mining data on usage of electronic nicotine delivery systems (ENDS) from YouTube videos.                                                                                 |                  |                |               |                      |                 | X         |       |          |           |
| Hua (2013)    | Health-related effects reported by electronic cigarette users in online forums.                                                                                          |                  | X              |               |                      |                 |           |       |          |           |
| Huang (2013)  | Assessing the impact of the national smoking ban in indoor public places in china: evidence from quit smoking related online searches.                                   |                  |                |               |                      |                 |           |       | X        |           |
| Huang (2014)  | A cross-sectional examination of marketing of electronic cigarettes on Twitter.                                                                                          |                  |                |               |                      |                 | X         |       |          |           |
| Huang (2014)  | The impact of price and tobacco control policies on the demand for electronic nicotine delivery systems.                                                                 |                  |                |               |                      |                 |           | X     | X        |           |
| Huang (2015)  | Electronic Cigarettes Among Priority Populations: Role of Smoking Cessation and Tobacco Control Policies.                                                                |                  |                |               | X                    | X               |           |       |          |           |
| Huang (2016)  | 100 Million Views of Electronic Cigarette YouTube Videos and Counting: Quantification, Content Evaluation, and Engagement Levels of Videos.                              |                  |                |               |                      |                 | X         |       |          |           |
| Hughes (2015) | Associations between e-cigarette access and smoking and drinking behaviours in teenagers.                                                                                |                  |                |               |                      | X               |           |       |          |           |
| Huh (2016)    | Progression of Poly-tobacco Product Use Patterns in Adolescents.                                                                                                         |                  |                |               |                      | X               |           |       |          |           |

**Appendix**  
**Overview of Electronic Nicotine Delivery Systems: A Systematic Review**  
**Glasser et al.**

|                    |                                                                                                                                                  | Product features | Health effects | Addictiveness | Consumer perceptions | Patterns of use | Marketing | Sales | Policies | Cessation |
|--------------------|--------------------------------------------------------------------------------------------------------------------------------------------------|------------------|----------------|---------------|----------------------|-----------------|-----------|-------|----------|-----------|
| Huh (2016)         | Intraindividual covariation between e-cigarette and combustible cigarette use in Korean American emerging adults.                                |                  |                |               |                      | X               |           |       |          |           |
| Hummel (2015)      | Prevalence and reasons for use of electronic cigarettes among smokers: Findings from the International Tobacco Control (ITC) Netherlands Survey. |                  |                |               | X                    | X               |           |       |          |           |
| Hureaux (2014)     | A case report of subacute bronchial toxicity induced by an electronic cigarette.                                                                 |                  | X              |               |                      |                 |           |       |          |           |
| Husari (2016)      | Acute Exposure to Electronic and Combustible Cigarette Aerosols: Effects in an Animal Model and in Human Alveolar Cells.                         |                  | X              |               |                      |                 |           |       |          |           |
| Hutzler (2014)     | Chemical hazards present in liquids and vapors of electronic cigarettes.                                                                         | X                |                |               |                      |                 |           |       |          |           |
| Hwang (2016)       | Electronic cigarette inhalation alters innate immunity and airway cytokines while increasing the virulence of colonizing bacteria.               |                  | X              |               |                      |                 |           |       |          |           |
| Ingebretsen (2012) | Electronic cigarette aerosol particle size distribution measurements.                                                                            | X                |                |               |                      |                 |           |       |          |           |
| Iskandar (2016)    | A framework for in vitro systems toxicology assessment of e-liquids.                                                                             |                  | X              |               |                      |                 |           |       |          |           |
| James (2016)       | E-Cigarettes for Immediate Smoking Substitution in Women Diagnosed with Cervical Dysplasia and Associated Disorders.                             |                  |                |               |                      |                 |           |       |          | X         |
| Jawad (2015)       | Waterpipe tobacco and electronic cigarette use in a southeast London adult sample: a cross-sectional analysis.                                   |                  |                |               |                      | X               |           |       |          |           |
| Ji (2016)          | Characterization of Electronic Cigarette Aerosol and Its Induction of Oxidative Stress Response in Oral Keratinocytes.                           |                  | X              |               |                      |                 |           |       |          |           |
| Jiang (2015)       | Electronic cigarette awareness and use among adults in Hong Kong.                                                                                |                  |                |               | X                    | X               |           |       |          |           |
| Jiang (2016)       | Electronic cigarette marketing tactics in mainland China.                                                                                        |                  |                |               |                      |                 | X         |       |          |           |
| Jiang (2016)       | Electronic cigarette use among adolescents: a cross-sectional study in Hong Kong.                                                                |                  |                |               |                      | X               |           |       |          |           |
| Jo (2014)          | US consumer interest in non-cigarette tobacco products spikes around the 2009 federal tobacco tax increase.                                      |                  |                |               |                      |                 |           |       | X        |           |

**Appendix**  
**Overview of Electronic Nicotine Delivery Systems: A Systematic Review**  
**Glasser et al.**

|                   |                                                                                                                                                               | Product features | Health effects | Addictiveness | Consumer perceptions | Patterns of use | Marketing | Sales | Policies | Cessation |
|-------------------|---------------------------------------------------------------------------------------------------------------------------------------------------------------|------------------|----------------|---------------|----------------------|-----------------|-----------|-------|----------|-----------|
| Jo (2015)         | Price-related promotions for tobacco products on Twitter.                                                                                                     |                  |                |               |                      |                 | X         |       |          |           |
| Johnson (2016)    | Tobacco Product Use Among Sexual Minority Adults: Findings From the 2012-2013 National Adult Tobacco Survey.                                                  |                  |                |               |                      | X               |           |       |          |           |
| Johnston (2015)   | Monitoring the Future National Survey on Drug Use: 1975-2014, key findings on adolescent drug use                                                             |                  |                |               |                      | X               |           |       |          |           |
| Johnston (2016)   | Monitoring the Future National Survey on Drug Use 1975-2015: 2015 Overview Key Findings on Adolescent Drug Use                                                |                  |                |               |                      | X               |           |       |          |           |
| Kadimpati (2015)  | Attitudes, beliefs, and practices regarding electronic nicotine delivery systems in patients scheduled for elective surgery.                                  |                  |                |               | X                    | X               |           |       |          |           |
| Kahr (2015)       | A qualitative assessment of the perceived risks of electronic cigarette and hookah use in pregnancy.                                                          |                  |                |               | X                    |                 |           |       |          |           |
| Kalkhoran (2015)  | Modeling the Health Effects of Expanding e-Cigarette Sales in the United States and United Kingdom: A Monte Carlo Analysis.                                   |                  |                |               |                      | X               |           |       |          |           |
| Kalkhoran (2015)  | Dual use of smokeless tobacco or e-cigarettes with cigarettes and cessation.                                                                                  |                  |                |               |                      | X               |           |       |          |           |
| Kalkhoran (2016)  | Multiple tobacco product use among young adult bar patrons in New Mexico.                                                                                     |                  |                |               |                      | X               |           |       |          |           |
| Kamboj (2016)     | Pediatric Exposure to E-Cigarettes, Nicotine, and Tobacco Products in the United States.                                                                      |                  | X              |               |                      |                 |           |       |          |           |
| Kandra (2014)     | Physicians' attitudes and use of e-cigarettes as cessation devices, North Carolina, 2013.                                                                     |                  |                |               | X                    |                 |           |       |          |           |
| Kasza (2014)      | Cigarette smokers' use of unconventional tobacco products and associations with quitting activity: findings from the ITC-4 U.S. cohort.                       |                  |                |               |                      | X               |           |       |          |           |
| Kavvalakis (2015) | Multicomponent analysis of replacement liquids of electronic cigarettes using chromatographic techniques.                                                     | X                |                |               |                      |                 |           |       |          |           |
| Khairudin (2016)  | Front to back ocular injury from a vaping-related explosion.                                                                                                  |                  | X              |               |                      |                 |           |       |          |           |
| Kienhuis (2015)   | Potential harmful health effects of inhaling nicotine-free shisha-pen vapor: a chemical risk assessment of the main components propylene glycol and glycerol. | X                |                |               |                      |                 |           |       |          |           |

**Appendix**  
**Overview of Electronic Nicotine Delivery Systems: A Systematic Review**  
**Glasser et al.**

|                  |                                                                                                                                                   | Product features | Health effects | Addictiveness | Consumer perceptions | Patterns of use | Marketing | Sales | Policies | Cessation |
|------------------|---------------------------------------------------------------------------------------------------------------------------------------------------|------------------|----------------|---------------|----------------------|-----------------|-----------|-------|----------|-----------|
| Kilibarda (2016) | E-cigarette use among Serbian adults: prevalence and user characteristics.                                                                        |                  |                |               |                      | X               |           |       |          |           |
| Kim (2013)       | Determination of tobacco-specific nitrosamines in replacement liquids of electronic cigarettes by liquid chromatography-tandem mass spectrometry. | X                |                |               |                      |                 |           |       |          |           |
| Kim (2015)       | Adult smokers' receptivity to a television advert for electronic nicotine delivery systems.                                                       |                  |                |               |                      |                 | X         |       |          |           |
| Kim (2014)       | E-cigarette advertising expenditures in the U.S., 2011-2012.                                                                                      |                  |                |               |                      |                 | X         |       |          |           |
| Kim (2015)       | Using Twitter Data to Gain Insights into E-cigarette Marketing and Locations of Use: An Inveillance Study.                                        |                  |                |               |                      |                 | X         |       |          |           |
| Kim (2015)       | Identifying e-cigarette vape stores: description of an online search methodology.                                                                 |                  |                |               |                      |                 |           | X     |          |           |
| King (2013)      | Awareness and ever-use of electronic cigarettes among U.S. adults, 2010-2011.                                                                     |                  |                |               | X                    | X               |           |       |          |           |
| King (2015)      | Trends in awareness and use of electronic cigarettes among US adults, 2010-2013.                                                                  |                  |                |               | X                    | X               |           |       |          |           |
| King (2015)      | Passive exposure to electronic cigarette (e-cigarette) use increases desire for combustible and e-cigarettes in young adult smokers.              |                  |                |               |                      | X               |           |       |          |           |
| King (2016)      | Exposure to electronic nicotine delivery systems (ENDS) visual imagery increases smoking urge and desire.                                         |                  |                | X             |                      |                 |           |       |          |           |
| Kingsbury (2016) | Deniers and Admitters: Examining Smoker Identities in a Changing Tobacco Landscape.                                                               |                  |                |               |                      | X               |           |       |          |           |
| Kinnunen (2015)  | Awareness and determinants of electronic cigarette use among Finnish adolescents in 2013: a population-based study.                               |                  |                |               | X                    | X               |           |       |          | X         |
| Kiviniemi (2015) | Deficiencies in public understanding about tobacco harm reduction: results from a United States national survey.                                  |                  |                |               | X                    |                 |           |       |          |           |
| Klein (2014)     | Tobacco control policies in outdoor areas of high volume American transit systems.                                                                |                  |                |               |                      |                 |           |       | X        |           |
| Kolar (2014)     | Support for indoor bans on electronic cigarettes among current and former smokers.                                                                |                  |                |               |                      |                 |           |       | X        |           |
| Kong (2015)      | Reasons for Electronic Cigarette Experimentation and Discontinuation Among Adolescents and Young Adults.                                          |                  |                |               | X                    | X               |           |       |          |           |



**Appendix**  
**Overview of Electronic Nicotine Delivery Systems: A Systematic Review**  
**Glasser et al.**

|                       |                                                                                                                                                                                                                                                                  | Product features | Health effects | Addictiveness | Consumer perceptions | Patterns of use | Marketing | Sales | Policies | Cessation |
|-----------------------|------------------------------------------------------------------------------------------------------------------------------------------------------------------------------------------------------------------------------------------------------------------|------------------|----------------|---------------|----------------------|-----------------|-----------|-------|----------|-----------|
| Kornfield (2015)      | Rapidly increasing promotional expenditures for e-cigarettes.                                                                                                                                                                                                    |                  |                |               |                      |                 | X         |       |          |           |
| Kosmider (2014)       | Carbonyl compounds in electronic cigarette vapors: effects of nicotine solvent and battery output voltage.                                                                                                                                                       | X                |                |               |                      |                 |           |       |          |           |
| Kosmider (2016)       | Cherry-flavoured electronic cigarettes expose users to the inhalation irritant, benzaldehyde.                                                                                                                                                                    | X                |                |               |                      |                 |           |       |          |           |
| Kotandeniya (2015)    | Combined analysis of N'-nitrosonornicotine and 4-(methylnitrosamino)-1-(3-pyridyl)-1-butanol in the urine of cigarette smokers and e-cigarette users.                                                                                                            |                  | X              |               |                      |                 |           |       |          |           |
| Kotecha (2015)        | Knowledge, attitudes and beliefs towards waterpipe tobacco smoking and electronic shisha (e-shisha) among young adults in London: a qualitative analysis.                                                                                                        |                  |                |               | X                    |                 |           |       |          |           |
| Kralikova (2012)      | The electronic cigarette: what proportion of smokers have tried it and how many use it regularly?                                                                                                                                                                |                  |                |               | X                    | X               |           |       |          |           |
| Kralikova (2013)      | Do e-cigarettes have the potential to compete with conventional cigarettes?: a survey of conventional cigarette smokers' experiences with e-cigarettes.                                                                                                          |                  |                |               | X                    | X               |           |       |          |           |
| Krause (2015)         | Hazardous waste status of discarded electronic cigarettes.                                                                                                                                                                                                       | X                |                |               |                      |                 |           |       |          |           |
| Krishnan-Sarin (2015) | E-cigarette Use Among High School and Middle School Adolescents in Connecticut.                                                                                                                                                                                  |                  |                |               | X                    | X               |           |       |          |           |
| Kristjansson (2015)   | Licit and Illicit Substance Use by Adolescent E-Cigarette Users Compared with Conventional Cigarette Smokers, Dual Users, and Nonusers.                                                                                                                          |                  |                |               |                      | X               |           |       |          |           |
| Kubica (2013)         | "Dilute & shoot" approach for rapid determination of trace amounts of nicotine in zero-level e-liquids by reversed phase liquid chromatography and hydrophilic interactions liquid chromatography coupled with tandem mass spectrometry-electrospray ionization. | X                |                |               |                      |                 |           |       |          |           |
| Kubica (2014)         | An evaluation of sucrose as a possible contaminant in e-liquids for electronic cigarettes by hydrophilic interaction liquid chromatography-tandem mass spectrometry.                                                                                             | X                |                |               |                      |                 |           |       |          |           |

**Appendix**  
**Overview of Electronic Nicotine Delivery Systems: A Systematic Review**  
**Glasser et al.**

|                    |                                                                                                                                                                                | Product features | Health effects | Addictiveness | Consumer perceptions | Patterns of use | Marketing | Sales | Policies | Cessation |
|--------------------|--------------------------------------------------------------------------------------------------------------------------------------------------------------------------------|------------------|----------------|---------------|----------------------|-----------------|-----------|-------|----------|-----------|
| Kumetz (2016)      | Electronic cigarette explosion injuries: A case series.                                                                                                                        |                  | X              |               |                      |                 |           |       |          |           |
| La Torre (2016)    | Country-level correlates of e-cigarette use in the European Union.                                                                                                             |                  |                |               |                      | X               |           |       | X        |           |
| Laugesen (2015)    | Nicotine and toxicant yield ratings of electronic cigarette brands in New Zealand.                                                                                             | X                |                |               |                      |                 |           |       |          |           |
| Lauterstein (2016) | Frontal Cortex Transcriptome Analysis of Mice Exposed to Electronic Cigarettes During Early Life Stages.                                                                       |                  | X              |               |                      |                 |           |       |          |           |
| Lazuras (2016)     | E-cigarettes as smoking cessation aids: a survey among practitioners in Italy.                                                                                                 |                  |                |               | X                    |                 |           |       |          |           |
| Lechner (2015)     | Effects of duration of electronic cigarette use.                                                                                                                               |                  |                |               |                      |                 |           |       |          | X         |
| Lechner (2015)     | The comparative efficacy of first- versus second-generation electronic cigarettes in reducing symptoms of nicotine withdrawal.                                                 |                  |                | X             |                      |                 |           |       |          |           |
| Lee (2014)         | Electronic cigarette use among Korean adolescents: a cross-sectional study of market penetration, dual use, and relationship to quit attempts and former smoking.              |                  |                |               |                      | X               | X         |       |          | X         |
| Lee (2015)         | 'Vape shops' and 'E-Cigarette lounges' open across the USA to promote ENDS.                                                                                                    |                  |                |               |                      |                 | X         | X     |          |           |
| Lee (2014)         | Multiple tobacco product use among adults in the United States: cigarettes, cigars, electronic cigarettes, hookah, smokeless tobacco, and snus.                                |                  |                |               |                      | X               |           |       |          |           |
| Lee (2015)         | Changes in puffing behavior among smokers who switched from tobacco to electronic cigarettes.                                                                                  |                  |                |               |                      | X               |           |       |          |           |
| Lee (2015)         | Youth tobacco product use in the United States.                                                                                                                                |                  |                |               |                      | X               |           |       |          |           |
| Lee (2016)         | Electronic cigarette use among Korean adults.                                                                                                                                  |                  |                |               |                      | X               |           |       |          |           |
| Lempert (2014)     | The importance of product definitions in US e-cigarette laws and regulations.                                                                                                  |                  |                |               |                      |                 |           |       | X        |           |
| Lerner (2015)      | Vapors produced by electronic cigarettes and e-juices with flavorings induce toxicity, oxidative stress, and inflammatory response in lung epithelial cells and in mouse lung. |                  | X              |               |                      |                 |           |       |          |           |
| Lerner (2015)      | Environmental health hazards of e-cigarettes and their components: Oxidants and copper in e-cigarette aerosols.                                                                | X                |                |               |                      |                 |           |       |          |           |
| Lessard (2014)     | Correlates of ever having used electronic cigarettes among older adolescent children of alcoholic fathers.                                                                     |                  |                |               |                      | X               |           |       |          |           |

**Appendix**  
**Overview of Electronic Nicotine Delivery Systems: A Systematic Review**  
**Glasser et al.**

|                     |                                                                                                                                                         | Product features | Health effects | Addictiveness | Consumer perceptions | Patterns of use | Marketing | Sales | Policies | Cessation |
|---------------------|---------------------------------------------------------------------------------------------------------------------------------------------------------|------------------|----------------|---------------|----------------------|-----------------|-----------|-------|----------|-----------|
| Leventhal (2015)    | Association of Electronic Cigarette Use With Initiation of Combustible Tobacco Product Smoking in Early Adolescence.                                    |                  |                |               |                      | X               |           |       |          |           |
| Leventhal (2016)    | Psychiatric comorbidity in adolescent electronic and conventional cigarette use.                                                                        |                  |                |               |                      | X               |           |       |          |           |
| Li (2013)           | The use and acceptability of electronic cigarettes among New Zealand smokers.                                                                           |                  |                |               | X                    |                 |           |       |          |           |
| Li (2014)           | The use of, and attitudes towards, electronic cigarettes and self-reported exposure to advertising and the product in general.                          |                  |                |               | X                    | X               | X         |       | X        |           |
| Li (2015)           | Susceptibility to e-cigarette use among never-users: findings from a survey of New Zealand adult smokers and ex-smokers.                                |                  |                |               | X                    |                 |           |       |          |           |
| Li (2015)           | Contextual Information Around the First Use of Electronic Cigarettes Among New Zealand Smokers and Recent Quitters.                                     |                  |                |               | X                    |                 |           |       |          |           |
| Li (2015)           | The prevalence, correlates and reasons for using electronic cigarettes among New Zealand adults.                                                        |                  |                |               | X                    | X               |           |       |          |           |
| Liber (2016)        | Combustible cigarettes cost less to use than e-cigarettes: global evidence and tax policy implications.                                                 |                  |                |               |                      |                 |           | X     |          |           |
| Lidon-Moyano (2016) | [Prevalence and user profile of electronic cigarettes in Spain (2014)].                                                                                 |                  |                |               |                      | X               |           |       |          |           |
| Lidon-Moyano (2016) | Correlation between tobacco control policies, consumption of rolled tobacco and e-cigarettes, and intention to quit conventional tobacco, in Europe.    |                  |                |               |                      |                 |           |       | X        |           |
| Link (2015)         | An Exploration of Online Behaviors and Social Media Use Among Hookah and Electronic-Cigarette Users.                                                    |                  |                |               | X                    |                 | X         | X     |          |           |
| Lippert (2015)      | Do Adolescent Smokers Use E-Cigarettes to Help Them Quit? The Sociodemographic Correlates and Cessation Motivations of U.S. Adolescent E-Cigarette Use. |                  |                |               |                      | X               |           |       |          |           |
| Lippert (2016)      | Temporal Changes in the Correlates of U.S. Adolescent Electronic Cigarette Use and Utilization in Tobacco Cessation, 2011 to 2013.                      |                  |                |               |                      | X               |           |       |          | X         |
| Lisko (2015)        | Chemical Composition and Evaluation of Nicotine, Tobacco Alkaloids, pH, and Selected                                                                    | X                |                |               |                      |                 |           |       |          |           |

**Appendix**  
**Overview of Electronic Nicotine Delivery Systems: A Systematic Review**  
**Glasser et al.**

|                    |                                                                                                                                                          | Product features | Health effects | Addictiveness | Consumer perceptions | Patterns of use | Marketing | Sales | Policies | Cessation |
|--------------------|----------------------------------------------------------------------------------------------------------------------------------------------------------|------------------|----------------|---------------|----------------------|-----------------|-----------|-------|----------|-----------|
|                    | Flavors in E-Cigarette Cartridges and Refill Solutions.                                                                                                  |                  |                |               |                      |                 |           |       |          |           |
| Little (2015)      | The Prevalence of E-cigarette Use in a Sample of U.S. Air Force Recruits.                                                                                |                  |                |               |                      | X               |           |       |          |           |
| Little (2015)      | Prevalence and Correlates of Tobacco and Nicotine Containing Product Use in a Sample of United States Air Force Trainees.                                |                  |                |               | X                    | X               |           |       |          |           |
| Littlefield (2015) | Electronic Cigarette Use Among College Students: Links to Gender, Race/Ethnicity, Smoking, and Heavy Drinking.                                           |                  |                |               |                      | X               |           |       |          |           |
| Long (2014)        | Comparison of select analytes in exhaled aerosol from e-cigarettes with exhaled smoke from a conventional cigarette and exhaled breaths.                 | X                |                |               |                      |                 |           |       |          |           |
| Loomis (2015)      | National and State-Specific Sales and Prices for Electronic Cigarettes-U.S., 2012-2013.                                                                  |                  |                |               |                      |                 |           | X     |          |           |
| Lopez (2015)       | Effects of Electronic Cigarette Liquid Nicotine Concentration on Plasma Nicotine and Puff Topography in Tobacco Cigarette Smokers: A Preliminary Report. |                  |                | X             | X                    |                 |           |       |          |           |
| Lotrean (2015)     | Use of electronic cigarettes among Romanian university students: a cross-sectional study.                                                                |                  |                |               |                      | X               |           |       |          |           |
| Loukas (2015)      | Changes in use of cigarettes and non-cigarette alternative products among college students.                                                              |                  |                |               |                      | X               |           |       |          |           |
| LoVecchio (2015)   | Incidence of electronic cigarette exposures in children skyrockets in Arizona.                                                                           |                  | X              |               |                      |                 |           |       |          |           |
| Luo (2014)         | Portrayal of electronic cigarettes on YouTube.                                                                                                           |                  |                |               |                      |                 | X         |       |          |           |
| Mackey (2015)      | Exploring the e-cigarette e-commerce marketplace: Identifying Internet e-cigarette marketing characteristics and regulatory gaps.                        |                  |                |               |                      |                 | X         | X     |          |           |
| Maina (2016)       | Transdermal nicotine absorption handling e-cigarette refill liquids.                                                                                     |                  | X              |               |                      |                 |           |       |          |           |
| Majeed (2015)      | Opinions about electronic cigarette use in smoke-free areas among u.s. Adults, 2012.                                                                     |                  |                |               | X                    | X               |           |       | X        |           |
| Maloney (2016)     | Insights from two industrial hygiene pilot e-cigarette passive vaping studies.                                                                           | X                |                |               |                      |                 |           |       |          |           |
| Manigrasso (2015)  | Particle doses in the pulmonary lobes of electronic and conventional cigarette users.                                                                    | X                |                |               |                      |                 |           |       |          |           |
| Manigrasso (2015)  | Aerosol deposition doses in the human respiratory tree of electronic cigarette smokers.                                                                  | X                | X              |               |                      |                 |           |       |          |           |

**Appendix**  
**Overview of Electronic Nicotine Delivery Systems: A Systematic Review**  
**Glasser et al.**

|                         |                                                                                                                                                           | Product features | Health effects | Addictiveness | Consumer perceptions | Patterns of use | Marketing | Sales | Policies | Cessation |
|-------------------------|-----------------------------------------------------------------------------------------------------------------------------------------------------------|------------------|----------------|---------------|----------------------|-----------------|-----------|-------|----------|-----------|
| Mantey (2016)           | E-Cigarette Marketing Exposure Is Associated With E-Cigarette Use Among US Youth.                                                                         |                  |                |               |                      | X               | X         |       |          |           |
| Manzoli (2015)          | Electronic Cigarettes Efficacy and Safety at 12 Months: Cohort Study.                                                                                     |                  | X              |               |                      |                 |           |       |          | X         |
| Marco (2015)            | A rapid method for the chromatographic analysis of volatile organic compounds in exhaled breath of tobacco cigarette and electronic cigarette smokers.    | X                |                |               |                      |                 |           |       |          |           |
| Margolis (2016)         | E-cigarette curiosity among U.S. middle and high school students: Findings from the 2014 national youth tobacco survey.                                   |                  |                |               | X                    |                 |           |       |          |           |
| Maridet (2015)          | The electronic cigarette: the new source of nickel contact allergy of the 21st century?                                                                   |                  | X              |               |                      |                 |           |       |          |           |
| Marini (2014)           | Short-term effects of electronic and tobacco cigarettes on exhaled nitric oxide.                                                                          | X                | X              |               |                      |                 |           |       |          |           |
| Mark (2015)             | Knowledge, Attitudes, and Practice of Electronic Cigarette Use Among Pregnant Women.                                                                      |                  |                |               | X                    | X               |           |       |          |           |
| Martinez (2014)         | On-Line Chemical Composition Analysis of Refillable Electronic Cigarette Aerosol-Measurement of Nicotine and Nicotyrine.                                  | X                |                |               |                      |                 |           |       |          |           |
| Martínez-Sánchez (2014) | Attitudes towards electronic cigarettes regulation in indoor workplaces and selected public and private places: a population-based cross-sectional study. |                  |                |               | X                    |                 |           |       | X        |           |
| Martínez-Sánchez (2014) | Electronic cigarette use among adult population: a cross-sectional study in Barcelona, Spain (2013-2014).                                                 |                  |                | X             | X                    | X               |           |       |          |           |
| Martinez-Sanchez (2015) | Perception of electronic cigarettes in the general population: does their usefulness outweigh their risks?                                                |                  |                |               | X                    |                 |           |       |          |           |
| Marynak (2014)          | State laws prohibiting sales to minors and indoor use of electronic nicotine delivery systems-- United States, November 2014.                             |                  |                |               |                      |                 |           |       | X        |           |
| Mays (2016)             | An experimental study of the effects of electronic cigarette warnings on young adult nonsmokers' perceptions and behavioral intentions.                   |                  |                |               |                      |                 | X         |       |          |           |
| Mays (2016)             | Openness to Using Non-cigarette Tobacco Products Among U.S. Young Adults.                                                                                 |                  |                |               |                      | X               |           |       |          |           |
| McAuley (2012)          | Comparison of the effects of e-cigarette vapor and cigarette smoke on indoor air quality.                                                                 | X                |                |               |                      |                 |           |       |          |           |

**Appendix**  
**Overview of Electronic Nicotine Delivery Systems: A Systematic Review**  
**Glasser et al.**

|                       |                                                                                                                                                     | Product features | Health effects | Addictiveness | Consumer perceptions | Patterns of use | Marketing | Sales | Policies | Cessation |
|-----------------------|-----------------------------------------------------------------------------------------------------------------------------------------------------|------------------|----------------|---------------|----------------------|-----------------|-----------|-------|----------|-----------|
| McCauley (2012)       | An unexpected consequence of electronic cigarette use.                                                                                              |                  | X              |               |                      |                 |           |       |          |           |
| McDonald (2015)       | One of several 'toys' for smoking: young adult experiences with electronic cigarettes in New York City.                                             |                  |                |               | X                    |                 |           |       |          |           |
| McGrath-Morrow (2015) | The effects of electronic cigarette emissions on systemic cotinine levels, weight and postnatal lung growth in neonatal mice.                       |                  | X              |               |                      |                 |           |       |          |           |
| McMillen (2012)       | Use of emerging tobacco products in the United States.                                                                                              |                  |                |               |                      | X               |           |       |          |           |
| McMillen (2014)       | Trends in Electronic Cigarette Use Among U.S. Adults: Use is Increasing in Both Smokers and Nonsmokers.                                             |                  |                |               |                      | X               |           |       |          |           |
| McPherson (2016)      | Self-reported smoking effects and comparative value between cigarettes and high dose e-cigarettes in nicotine-dependent cigarette smokers.          |                  |                | X             |                      |                 |           |       |          |           |
| McQueen (2011)        | Interviews with "vapers": implications for future research with electronic cigarettes.                                                              | X                |                |               | X                    |                 |           |       |          |           |
| McQueen (2016)        | Smoking Cessation and Electronic Cigarette Use among Head and Neck Cancer Patients.                                                                 |                  |                |               |                      |                 |           |       |          | X         |
| McRobbie (2015)       | Effects of Switching to Electronic Cigarettes with and without Concurrent Smoking on Exposure to Nicotine, Carbon Monoxide, and Acrolein.           |                  | X              |               |                      | X               |           |       |          | X         |
| Meernik (2016)        | Electronic Cigarettes on Hospital Campuses.                                                                                                         |                  |                |               |                      |                 |           |       | X        |           |
| Meier (2015)          | Which nicotine products are gateways to regular use? First-trying tobacco and current use in college students.                                      |                  |                |               |                      | X               |           |       |          |           |
| Mello (2015)          | Perceived Harm of Secondhand Electronic Cigarette Vapors and Policy Support to Restrict Public Vaping: Results From a National Survey of US Adults. |                  |                |               |                      |                 |           |       | X        |           |
| Miao (2016)           | High-Intensity Sweeteners in Alternative Tobacco Products.                                                                                          | X                |                |               |                      |                 |           |       |          |           |
| Miech (2015)          | E-Cigarettes and the Drug Use Patterns of Adolescents.                                                                                              |                  |                |               |                      | X               |           |       |          |           |
| Mikheev (2016)        | Real-Time Measurement of Electronic Cigarette Aerosol Size Distribution and Metals Content Analysis.                                                | X                |                |               |                      |                 |           |       |          |           |
| Miller (2014)         | E-cigarette ban proposed in Toronto.                                                                                                                |                  |                |               |                      |                 |           |       | X        |           |

**Appendix**  
**Overview of Electronic Nicotine Delivery Systems: A Systematic Review**  
**Glasser et al.**

|                  |                                                                                                                                                                                                                                                    | Product features | Health effects | Addictiveness | Consumer perceptions | Patterns of use | Marketing | Sales | Policies | Cessation |
|------------------|----------------------------------------------------------------------------------------------------------------------------------------------------------------------------------------------------------------------------------------------------|------------------|----------------|---------------|----------------------|-----------------|-----------|-------|----------|-----------|
| Misra (2014)     | Comparative in vitro toxicity profile of electronic and tobacco cigarettes, smokeless tobacco and nicotine replacement therapy products: e-liquids, extracts and collected aerosols.                                                               |                  | X              |               |                      |                 |           |       |          |           |
| Moore (2014)     | E-cigarette use and intentions to smoke among 10-11-year-old never-smokers in Wales.                                                                                                                                                               |                  |                |               | X                    | X               |           |       |          |           |
| Moore (2015)     | Electronic-cigarette use among young people in Wales: evidence from two cross-sectional surveys.                                                                                                                                                   |                  |                |               |                      | X               |           |       |          |           |
| Morean (2016)    | Latent class analysis of current e-cigarette and other substance use in high school students.                                                                                                                                                      |                  |                |               |                      | X               |           |       |          |           |
| Morris (2015)    | Online electronic cigarette retailers can do more to prevent accidental poisonings.                                                                                                                                                                |                  |                |               |                      |                 | X         |       |          |           |
| Mowry (2014)     | 2013 Annual Report of the American Association of Poison Control Centers' National Poison Data System (NPDS): 31nd Annual Report.                                                                                                                  |                  | X              |               |                      |                 |           |       |          |           |
| Mowry (2015)     | 2014 Annual Report of the American Association of Poison Control Centers' National Poison Data System (NPDS): 32nd Annual Report.                                                                                                                  |                  | X              |               |                      |                 |           |       |          |           |
| Moysidou (2016)  | Knowledge and Perceptions about Nicotine, Nicotine Replacement Therapies and Electronic Cigarettes among Healthcare Professionals in Greece.                                                                                                       |                  |                |               | X                    |                 |           |       | X        |           |
| Myslín (2013)    | Using twitter to examine smoking behavior and perceptions of emerging tobacco products.                                                                                                                                                            |                  |                |               | X                    |                 |           |       |          |           |
| Nadasan (2016)   | Use of electronic cigarettes and alternative tobacco products among Romanian adolescents.                                                                                                                                                          |                  |                |               |                      | X               |           |       |          |           |
| Nagelhout (2016) | E-cigarette advertisements, and associations with the use of e-cigarettes and disapproval or quitting of smoking: Findings from the International Tobacco Control (ITC) Netherlands Survey.                                                        |                  |                |               |                      |                 | X         |       |          |           |
| Nayak (2016)     | A Qualitative Study of Vape Shop Operators' Perceptions of Risks and Benefits of E-Cigarette Use and Attitude Toward Their Potential Regulation by the US Food and Drug Administration, Florida, Georgia, South Carolina, or North Carolina, 2015. |                  |                |               | X                    |                 |           |       | X        |           |
| Neff (2015)      | Frequency of Tobacco Use Among Middle and High School Students--United States, 2014.                                                                                                                                                               |                  |                |               |                      | X               |           |       |          |           |

**Appendix**  
**Overview of Electronic Nicotine Delivery Systems: A Systematic Review**  
**Glasser et al.**

|                   |                                                                                                                                                                                        | Product features | Health effects | Addictiveness | Consumer perceptions | Patterns of use | Marketing | Sales | Policies | Cessation |
|-------------------|----------------------------------------------------------------------------------------------------------------------------------------------------------------------------------------|------------------|----------------|---------------|----------------------|-----------------|-----------|-------|----------|-----------|
| Neilson (2015)    | Development of an in vitro cytotoxicity model for aerosol exposure using 3D reconstructed human airway tissue; application for assessment of e-cigarette aerosol.                      |                  | X              |               |                      |                 |           |       |          |           |
| Nelson (2015)     | Comparison of the characteristics of long-term users of electronic cigarettes versus nicotine replacement therapy: A cross-sectional survey of English ex-smokers and current smokers. |                  |                | X             | X                    |                 |           |       |          |           |
| Nichols (2015)    | Cue-reactivity in experienced electronic cigarette users: Novel stimulus videos and a pilot fMRI study.                                                                                |                  |                | X             |                      |                 |           |       |          |           |
| Nides (2014)      | Nicotine blood levels and short-term smoking reduction with an electronic nicotine delivery system.                                                                                    |                  | X              | X             |                      |                 |           |       |          | X         |
| Nikitin (2016)    | Is the E-Liquid Industry Regulating Itself? A Look at E-Liquid Internet Vendors in the United States.                                                                                  |                  |                |               |                      |                 |           | X     |          |           |
| Nolan (2016)      | Feasibility of Electronic Nicotine Delivery Systems in Surgical Patients.                                                                                                              |                  |                |               | X                    |                 |           |       |          | X         |
| Noland (2016)     | Social influences on use of cigarettes, e-cigarettes, and hookah by college students.                                                                                                  |                  |                |               | X                    |                 |           |       |          |           |
| Nonnemaker (2016) | Quantifying how smokers value attributes of electronic cigarettes.                                                                                                                     |                  |                |               |                      |                 |           |       | X        |           |
| Norton (2014)     | Initial puffing behaviors and subjective responses differ between an electronic nicotine delivery system and traditional cigarettes.                                                   |                  | X              | X             |                      | X               |           |       |          |           |
| Nutt (2014)       | Estimating the harms of nicotine-containing products using the MCDA approach.                                                                                                          |                  | X              | X             |                      |                 |           |       |          |           |
| O'Brien (2015)    | E-cigarettes versus NRT for smoking reduction or cessation in people with mental illness: secondary analysis of data from the ASCEND trial.                                            |                  |                |               |                      |                 |           |       |          | X         |
| Oh (2015)         | Identification and Quantification of Several Contaminated Compounds in Replacement Liquids of Electronic Cigarettes by Gas Chromatography-Mass Spectrometry.                           | X                |                |               |                      |                 |           |       |          |           |
| Olmedo (2016)     | A direct method for e-cigarette aerosol sample collection.                                                                                                                             | X                |                |               |                      |                 |           |       |          |           |
| Oncken (2015)     | Nicotine concentrations with electronic cigarette use: effects of sex and flavor.                                                                                                      |                  |                |               | X                    |                 |           |       |          |           |



**Appendix**  
**Overview of Electronic Nicotine Delivery Systems: A Systematic Review**  
**Glasser et al.**

|                  |                                                                                                                                                            | Product features | Health effects | Addictiveness | Consumer perceptions | Patterns of use | Marketing | Sales | Policies | Cessation |
|------------------|------------------------------------------------------------------------------------------------------------------------------------------------------------|------------------|----------------|---------------|----------------------|-----------------|-----------|-------|----------|-----------|
| Ooms (2015)      | Sociodemographic Differences in the Use of Electronic Nicotine Delivery Systems in the European Union.                                                     |                  |                |               |                      | X               |           |       |          |           |
| Ordonez (2015)   | Electronic cigarette exposures reported to Texas poison centers.                                                                                           |                  | X              |               |                      |                 |           |       |          |           |
| Pacifici (2015)  | Successful Nicotine Intake in Medical Assisted Use of E-Cigarettes: A Pilot Study.                                                                         |                  |                |               |                      |                 |           |       |          | X         |
| Paek (2014)      | Reduced harm or another gateway to smoking? source, message, and information characteristics of E-cigarette videos on YouTube.                             |                  |                |               |                      |                 | X         |       |          |           |
| Pagano (2016)    | Determination of Nicotine Content and Delivery in Disposable Electronic Cigarettes Available in the United States by Gas Chromatography-Mass Spectrometry. | X                |                |               |                      |                 |           |       |          |           |
| Page (2016)      | The acute effects of electronic cigarette smoking on the cutaneous circulation.                                                                            |                  | X              |               |                      |                 |           |       |          |           |
| Paley (2016)     | Corneoscleral Laceration and Ocular Burns Caused by Electronic Cigarette Explosions.                                                                       |                  | X              |               |                      |                 |           |       |          |           |
| Palipudi (2015)  | Awareness and Current Use of Electronic Cigarettes in Indonesia, Malaysia, Qatar, and Greece: Findings from 2011-2013 Global Adult Tobacco Surveys.        |                  |                |               | X                    | X               |           |       |          |           |
| Panitz (2015)    | A C. elegans model of electronic cigarette use: Physiological effects of e-liquids in nematodes.                                                           |                  | X              |               |                      |                 |           |       |          |           |
| Paradise (2014)  | Electronic cigarettes: smoke-free laws, sale restrictions, and the public health.                                                                          |                  |                |               |                      |                 |           |       | X        |           |
| Park (2016)      | E-Cigarette Use and Intention to Initiate or Quit Smoking Among US Youths.                                                                                 |                  |                |               |                      | X               |           |       |          |           |
| Patterson (2016) | Who thinks what about e-cigarette regulation? A content analysis of UK newspapers.                                                                         |                  |                |               |                      |                 |           |       | X        |           |
| Peace (2016)     | Concentration of Nicotine and Glycols in 27 Electronic Cigarette Formulations.                                                                             | X                |                |               |                      |                 |           |       |          |           |
| Pearson (2012)   | e-Cigarette awareness, use, and harm perceptions in US adults.                                                                                             |                  |                |               | X                    | X               |           |       |          |           |
| Pearson (2015)   | E-Cigarettes and Smoking Cessation: Insights and Cautions From a Secondary Analysis of Data From a Study of Online Treatment-Seeking Smokers.              |                  |                |               |                      |                 |           |       |          | X         |

**Appendix**  
**Overview of Electronic Nicotine Delivery Systems: A Systematic Review**  
**Glasser et al.**

|                   |                                                                                                                                   | Product features | Health effects | Addictiveness | Consumer perceptions | Patterns of use | Marketing | Sales | Policies | Cessation |
|-------------------|-----------------------------------------------------------------------------------------------------------------------------------|------------------|----------------|---------------|----------------------|-----------------|-----------|-------|----------|-----------|
| Pechacek (2016)   | The Potential That Electronic Nicotine Delivery Systems Can be a Disruptive Technology: Results From a National Survey.           |                  |                |               | X                    | X               |           |       |          | X         |
| Pellegrino (2012) | Electronic cigarettes: an evaluation of exposure to chemicals and fine particulate matter (PM).                                   | X                |                |               |                      |                 |           |       |          |           |
| Pentz (2015)      | Parent, peer, and executive function relationships to early adolescent e-cigarette use: a substance use pathway?                  |                  |                |               |                      | X               |           |       |          |           |
| Penzes (2016)     | Intention to Experiment With E-Cigarettes in a Cross-Sectional Survey of Undergraduate University Students in Hungary.            |                  |                |               | X                    | X               |           |       |          |           |
| Pepper (2013)     | Adolescent males' awareness of and willingness to try electronic cigarettes.                                                      |                  |                |               | X                    |                 |           |       |          |           |
| Pepper (2014)     | Healthcare providers' beliefs and attitudes about electronic cigarettes and preventive counseling for adolescent patients.        |                  |                |               | X                    |                 |           |       |          |           |
| Pepper (2014)     | How U.S. adults find out about electronic cigarettes: implications for public health messages.                                    |                  |                |               |                      |                 | X         |       |          |           |
| Pepper (2014)     | Effects of advertisements on smokers' interest in trying e-cigarettes: the roles of product comparison and visual cues.           |                  |                |               |                      |                 | X         |       |          |           |
| Pepper (2015)     | How risky is it to use e-cigarettes? Smokers' beliefs about their health risks from using novel and traditional tobacco products. |                  |                |               | X                    | X               |           |       |          |           |
| Pepper (2014)     | Reasons for starting and stopping electronic cigarette use.                                                                       |                  |                |               | X                    |                 |           |       |          | X         |
| Pepper (2015)     | Physicians' Counseling of Adolescents Regarding E-Cigarette Use.                                                                  |                  |                |               | X                    |                 |           |       | X        |           |
| Perkins (2015)    | Reinforcement enhancing effects of acute nicotine via electronic cigarettes.                                                      |                  |                | X             | X                    |                 |           |       |          |           |
| Pesko (2016)      | The effect of potential electronic nicotine delivery system regulations on nicotine product selection.                            |                  |                |               |                      |                 |           |       | X        |           |
| Pesko (2016)      | The influence of electronic cigarette age purchasing restrictions on adolescent tobacco and marijuana use.                        |                  |                |               |                      |                 |           |       | X        |           |
| Peters (2013)     | The social norms and beliefs of teenage male electronic cigarette use.                                                            |                  |                |               | X                    |                 |           |       |          |           |

**Appendix**  
**Overview of Electronic Nicotine Delivery Systems: A Systematic Review**  
**Glasser et al.**

|                |                                                                                                                                       | Product features | Health effects | Addictiveness | Consumer perceptions | Patterns of use | Marketing | Sales | Policies | Cessation |
|----------------|---------------------------------------------------------------------------------------------------------------------------------------|------------------|----------------|---------------|----------------------|-----------------|-----------|-------|----------|-----------|
| Peters (2015)  | Electronic cigarettes in adults in outpatient substance use treatment: Awareness, perceptions, use, and reasons for use.              |                  |                |               | X                    | X               |           |       |          |           |
| Pineiro (2015) | Gender differences in use and expectancies of e-cigarettes: Online survey results.                                                    |                  |                |               | X                    | X               |           |       |          |           |
| Pokhrel (2013) | Smokers who try e-cigarettes to quit smoking: findings from a multiethnic study in Hawaii.                                            |                  |                |               |                      |                 |           |       |          | X         |
| Pokhrel (2014) | Electronic cigarette use outcome expectancies among college students.                                                                 |                  |                |               |                      | X               |           |       |          |           |
| Pokhrel (2014) | Correlates of use of electronic cigarettes versus nicotine replacement therapy for help with smoking cessation.                       |                  |                |               |                      |                 |           |       |          | X         |
| Pokhrel (2015) | Reasons for quitting cigarette smoking and electronic cigarette use for cessation help.                                               |                  |                |               |                      |                 |           |       |          | X         |
| Pokhrel (2015) | Contexts of cigarette and e-cigarette use among dual users: a qualitative study.                                                      |                  |                |               | X                    | X               |           |       |          |           |
| Pokhrel (2015) | Receptivity to e-cigarette marketing, harm perceptions, and e-cigarette use.                                                          |                  |                |               | X                    | X               | X         |       |          |           |
| Pokhrel (2016) | E-cigarette advertising exposure and implicit attitudes among young adult non-smokers.                                                |                  |                |               |                      |                 | X         |       |          |           |
| Polosa (2011)  | Effect of an electronic nicotine delivery device (e-Cigarette) on smoking reduction and cessation: a prospective 6-month pilot study. |                  |                |               |                      |                 |           |       |          | X         |
| Polosa (2014)  | Effectiveness and tolerability of electronic cigarette in real-life: a 24-month prospective observational study.                      |                  |                |               |                      |                 |           |       |          | X         |
| Polosa (2014)  | Effect of smoking abstinence and reduction in asthmatic smokers switching to electronic cigarettes: evidence for harm reversal.       |                  | X              |               |                      |                 |           |       |          |           |
| Polosa (2014)  | Success rates with nicotine personal vaporizers: a prospective 6-month pilot study of smokers not intending to quit.                  |                  | X              |               | X                    |                 |           |       |          | X         |
| Polosa (2015)  | Quit and smoking reduction rates in vape shop consumers: a prospective 12-month survey.                                               |                  |                |               |                      | X               |           |       |          | X         |
| Polosa (2016)  | Persisting long term benefits of smoking abstinence and reduction in asthmatic smokers who have switched to electronic cigarettes.    |                  | X              |               |                      |                 |           |       |          | X         |
| Ponzoni (2015) | Different physiological and behavioural effects of e-cigarette vapour and cigarette smoke in mice.                                    |                  | X              |               |                      |                 |           |       |          |           |

**Appendix**  
**Overview of Electronic Nicotine Delivery Systems: A Systematic Review**  
**Glasser et al.**

|                    |                                                                                                                                                          | Product features | Health effects | Addictiveness | Consumer perceptions | Patterns of use | Marketing | Sales | Policies | Cessation |
|--------------------|----------------------------------------------------------------------------------------------------------------------------------------------------------|------------------|----------------|---------------|----------------------|-----------------|-----------|-------|----------|-----------|
| Popa (2015)        | Infrared spectroscopy study of the influence of inhaled vapors/smoke produced by cigarettes of active smokers.                                           |                  | X              |               |                      |                 |           |       |          |           |
| Popova (2013)      | Alternative tobacco product use and smoking cessation: a national study.                                                                                 |                  |                |               |                      | X               |           |       |          | X         |
| Popova (2014)      | Nonsmokers' responses to new warning labels on smokeless tobacco and electronic cigarettes: an experimental study.                                       |                  |                |               | X                    |                 |           |       |          |           |
| Popova (2015)      | Testing antismoking messages for Air Force trainees.                                                                                                     |                  |                |               |                      |                 | X         |       |          |           |
| Porter (2015)      | Electronic Cigarette and Traditional Cigarette Use among Middle and High School Students in Florida, 2011-2014.                                          |                  |                |               |                      | X               |           |       |          |           |
| Pratt (2016)       | Appeal of electronic cigarettes in smokers with serious mental illness.                                                                                  |                  | X              |               | X                    |                 |           |       |          | X         |
| Primack (2015)     | Progression to Traditional Cigarette Smoking After Electronic Cigarette Use Among US Adolescents and Young Adults.                                       |                  |                |               |                      | X               |           |       |          |           |
| Prochaska (2014)   | E-cigarette use among smokers with serious mental illness.                                                                                               |                  |                |               |                      | X               |           |       |          | X         |
| Pulvers (2015)     | Tobacco Use, Quitting Behavior, and Health Characteristics Among Current Electronic Cigarette Users in a National Tri-Ethnic Adult Stable Smoker Sample. |                  |                |               |                      | X               |           |       |          | X         |
| Quisenberry (2015) | The Experimental Tobacco Marketplace I: Substitutability as a Function of the Price of Conventional Cigarettes.                                          |                  |                |               |                      |                 |           | X     |          |           |
| Ramamurthi (2015)  | Electronic cigarette marketers manipulate antitobacco advertisements to promote vaping.                                                                  |                  |                |               |                      |                 | X         |       |          |           |
| Ramo (2015)        | Prevalence and correlates of electronic-cigarette use in young adults: findings from three studies over five years.                                      |                  |                |               |                      | X               |           |       |          | X         |
| Ramoa (2016)       | Electronic cigarette nicotine delivery can exceed that of combustible cigarettes: a preliminary report.                                                  |                  |                | X             |                      | X               |           |       |          |           |
| Rass (2015)        | Characterizing Use Patterns and Perceptions of Relative Harm in Dual Users of Electronic and Tobacco Cigarettes.                                         |                  |                | X             | X                    | X               |           |       |          |           |
| Regan (2013)       | Electronic nicotine delivery systems: adult use and awareness of the 'e-cigarette' in the USA.                                                           |                  |                |               | X                    | X               |           |       |          |           |

**Appendix**  
**Overview of Electronic Nicotine Delivery Systems: A Systematic Review**  
**Glasser et al.**

|                   |                                                                                                                                                                                                              | Product features | Health effects | Addictiveness | Consumer perceptions | Patterns of use | Marketing | Sales | Policies | Cessation |
|-------------------|--------------------------------------------------------------------------------------------------------------------------------------------------------------------------------------------------------------|------------------|----------------|---------------|----------------------|-----------------|-----------|-------|----------|-----------|
| Regueiro (2016)   | Optimization of a Differential Ion Mobility Spectrometry-Tandem Mass Spectrometry Method for High-Throughput Analysis of Nicotine and Related Compounds: Application to Electronic Cigarette Refill Liquids. | X                |                |               |                      |                 |           |       |          |           |
| Reid (2015)       | Who is using e-cigarettes in Canada? Nationally representative data on the prevalence of e-cigarette use among Canadians.                                                                                    |                  |                |               |                      | X               |           |       |          |           |
| Rennie (2016)     | Harm Reduction or Harm Introduction? Prevalence and Correlates of E-Cigarette Use Among French Adolescents.                                                                                                  |                  |                |               |                      | X               |           |       |          |           |
| Reuther (2016)    | Do you mind if I vape? Immediate effects of electronic cigarettes on perfusion in buccal mucosal tissue - a pilot study.                                                                                     |                  | X              |               |                      |                 |           |       |          |           |
| Richardson (2014) | Noncombustible tobacco product advertising: how companies are selling the new face of tobacco.                                                                                                               |                  |                |               |                      |                 | X         |       |          |           |
| Richardson (2015) | Tobacco on the web: surveillance and characterisation of online tobacco and e-cigarette advertising.                                                                                                         |                  |                |               |                      |                 | X         |       |          |           |
| Richardson (2014) | Prevalence, harm perceptions, and reasons for using noncombustible tobacco products among current and former smokers.                                                                                        |                  |                |               | X                    |                 |           |       |          |           |
| Rigotti (2015)    | Increasing prevalence of electronic cigarette use among smokers hospitalized in 5 US cities, 2010-2013.                                                                                                      |                  |                |               |                      | X               |           |       |          |           |
| Ring (2016)       | A Cancer That Went Up in Smoke: Pulmonary Reaction to e-Cigarettes Imitating Metastatic Cancer.                                                                                                              |                  | X              |               |                      |                 |           |       |          |           |
| Robinson (2015)   | Electronic Cigarette Topography in the Natural Environment.                                                                                                                                                  |                  |                |               |                      | X               |           |       |          |           |
| Roditis (2015)    | Adolescents' Perceptions of Risks and Benefits of Conventional Cigarettes, E-cigarettes, and Marijuana: A Qualitative Analysis.                                                                              |                  |                |               | X                    |                 |           |       |          |           |
| Roditis (2016)    | Adolescents' Perceptions of Health Risks, Social Risks, and Benefits Differ Across Tobacco Products.                                                                                                         |                  |                |               | X                    |                 |           |       |          |           |
| Romagna (2013)    | Cytotoxicity evaluation of electronic cigarette vapor extract on cultured mammalian fibroblasts                                                                                                              |                  | X              |               |                      |                 |           |       |          |           |

**Appendix**  
**Overview of Electronic Nicotine Delivery Systems: A Systematic Review**  
**Glasser et al.**

|                   |                                                                                                                                    | Product features | Health effects | Addictiveness | Consumer perceptions | Patterns of use | Marketing | Sales | Policies | Cessation |
|-------------------|------------------------------------------------------------------------------------------------------------------------------------|------------------|----------------|---------------|----------------------|-----------------|-----------|-------|----------|-----------|
|                   | (ClearStream-LIFE): comparison with tobacco cigarette smoke extract.                                                               |                  |                |               |                      |                 |           |       |          |           |
| Romito (2015)     | A Snapshot of the Depiction of Electronic Cigarettes in YouTube Videos.                                                            |                  |                |               |                      |                 | X         |       |          |           |
| Rooke (2014)      | News media representations of electronic cigarettes: an analysis of newspaper coverage in the UK and Scotland.                     |                  |                |               |                      |                 | X         |       |          |           |
| Rooke (2015)      | Smokers' and ex-smokers' understanding of electronic cigarettes: a qualitative study.                                              |                  |                |               | X                    |                 |           |       |          |           |
| Rosbrook (2016)   | Sensory Effects of Menthol and Nicotine in an E-Cigarette.                                                                         |                  |                | X             |                      |                 |           |       |          |           |
| Rose (2014)       | The availability of electronic cigarettes in U.S. retail outlets, 2012: results of two national studies.                           |                  |                |               |                      |                 |           | X     |          |           |
| Rubenstein (2015) | Tobacco and e-cigarette products initiate Kupffer cell inflammatory responses.                                                     |                  | X              |               |                      |                 |           |       |          |           |
| Rudy (2016)       | Electronic nicotine delivery systems: overheating, fires and explosions.                                                           |                  | X              |               |                      |                 |           |       |          |           |
| Ruprecht (2014)   | Comparison between particulate matter and ultrafine particle emission by electronic and normal cigarettes in real-life conditions. | X                |                |               |                      |                 |           |       |          |           |
| Russo (2016)      | Evaluation of Post Cessation Weight Gain in a 1-Year Randomized Smoking Cessation Trial of Electronic Cigarettes.                  |                  | X              |               |                      |                 |           |       |          |           |
| Ruther (2015)     | Electronic Cigarettes-Attitudes and Use in Germany.                                                                                |                  |                | X             | X                    | X               |           |       |          |           |
| Rutten (2015)     | Use of e-Cigarettes among Current Smokers: Associations among Reasons for Use, Quit Intentions, and Current Tobacco Use.           |                  |                |               | X                    | X               |           |       |          | X         |
| Saddleson (2015)  | Risky behaviors, e-cigarette use and susceptibility of use among college students.                                                 |                  |                |               |                      | X               |           |       |          |           |
| Saddleson (2016)  | Enjoyment and other reasons for electronic cigarette use: Results from college students in New York.                               |                  |                |               | X                    | X               |           |       |          |           |
| Salloum (2016)    | Use of Electronic Cigarettes Among Cancer Survivors in the U.S.                                                                    |                  |                |               |                      | X               |           |       |          |           |
| Salturk (2015)    | Effects of Electronic Nicotine Delivery System on Larynx: Experimental Study.                                                      |                  | X              |               |                      |                 |           |       |          |           |
| Sancilio (2015)   | Cytotoxicity and apoptosis induction by e-cigarette fluids in human gingival fibroblasts.                                          |                  | X              |               |                      |                 |           |       |          |           |

**Appendix**  
**Overview of Electronic Nicotine Delivery Systems: A Systematic Review**  
**Glasser et al.**

|                        |                                                                                                                                                  | Product features | Health effects | Addictiveness | Consumer perceptions | Patterns of use | Marketing | Sales | Policies | Cessation |
|------------------------|--------------------------------------------------------------------------------------------------------------------------------------------------|------------------|----------------|---------------|----------------------|-----------------|-----------|-------|----------|-----------|
| Sanders-Jackson (2014) | Knowledge About E-Cigarette Constituents and Regulation: Results From a National Survey of U.S. Young Adults.                                    |                  |                |               | X                    | X               |           |       | X        |           |
| Sanders-Jackson (2015) | Effect of warning statements in e-cigarette advertisements: an experiment with young adults in the US.                                           |                  |                |               |                      |                 | X         |       |          |           |
| Schaal (2016)          | Nicotine-Mediated Regulation of Nicotinic Acetylcholine Receptors in Non-Small Cell Lung Adenocarcinoma by E2F1 and STAT1 Transcription Factors. |                  | X              |               |                      |                 |           |       |          |           |
| Scheffler (2015)       | Cytotoxic Evaluation of e-Liquid Aerosol using Different Lung-Derived Cell Models.                                                               |                  | X              |               |                      |                 |           |       |          |           |
| Scheffler (2015)       | Evaluation of e-cigarette liquid vapor and mainstream cigarette smoke after direct exposure of primary human bronchial epithelial cells.         |                  | X              |               |                      |                 |           |       |          |           |
| Schipper (2014)        | A new challenge: suicide attempt using nicotine fillings for electronic cigarettes.                                                              |                  | X              |               |                      |                 |           |       |          |           |
| Schmidt (2014)         | Prevalence and reasons for initiating use of electronic cigarettes among adults in Montana, 2013.                                                |                  |                |               | X                    | X               |           |       |          |           |
| Schmitt (2014)         | Research support for effective state and community tobacco control programme response to electronic nicotine delivery systems.                   |                  |                |               |                      |                 |           |       | X        |           |
| Schober (2014)         | Use of electronic cigarettes (e-cigarettes) impairs indoor air quality and increases FeNO levels of e-cigarette consumers.                       | X                | X              |               |                      |                 |           |       |          |           |
| Schoenborn (2015)      | Electronic Cigarette Use Among Adults: United States, 2014.                                                                                      |                  |                |               |                      | X               |           |       |          |           |
| Schripp (2013)         | Does e-cigarette consumption cause passive vaping?                                                                                               | X                |                |               |                      |                 |           |       |          |           |
| Schweitzer (2015)      | Endothelial disruptive proinflammatory effects of nicotine and e-cigarette vapor exposures.                                                      |                  | X              |               |                      |                 |           |       |          |           |
| Seidenberg (2013)      | Availability and range of tobacco products for sale in Massachusetts pharmacies.                                                                 |                  |                |               |                      |                 |           | X     |          |           |
| Seidenberg (2016)      | Differences in the design and sale of e-cigarettes by cigarette manufacturers and non-cigarette manufacturers in the USA.                        |                  |                |               |                      |                 |           | X     |          |           |
| Shen (2016)            | Transcriptome sequencing reveals e-cigarette vapor and mainstream-smoke from tobacco                                                             |                  | X              |               |                      |                 |           |       |          |           |

**Appendix**  
**Overview of Electronic Nicotine Delivery Systems: A Systematic Review**  
**Glasser et al.**

|                      |                                                                                                                                                                               | Product features | Health effects | Addictiveness | Consumer perceptions | Patterns of use | Marketing | Sales | Policies | Cessation |
|----------------------|-------------------------------------------------------------------------------------------------------------------------------------------------------------------------------|------------------|----------------|---------------|----------------------|-----------------|-----------|-------|----------|-----------|
|                      | cigarettes activate different gene expression profiles in human bronchial epithelial cells.                                                                                   |                  |                |               |                      |                 |           |       |          |           |
| Sherratt (2015)      | Perceptions towards electronic cigarettes for smoking cessation among Stop Smoking Service users.                                                                             |                  |                |               | X                    |                 |           |       |          |           |
| Sherratt (2016)      | Electronic cigarettes: a survey of perceived patient use and attitudes among members of the British thoracic oncology group.                                                  |                  |                |               | X                    |                 |           |       |          |           |
| Sherwood (2016)      | Airway epithelial cell exposure to distinct e-cigarette liquid flavorings reveals toxicity thresholds and activation of CFTR by the chocolate flavoring 2,5-dimethylpyrazine. |                  | X              |               |                      |                 |           |       |          |           |
| Shiffman (2015)      | The Impact of Flavor Descriptors on Nonsmoking Teens' and Adult Smokers' Interest in Electronic Cigarettes.                                                                   |                  |                |               | X                    |                 |           |       |          |           |
| Shiplo (2015)        | E-cigarette use in Canada: prevalence and patterns of use in a regulated market.                                                                                              |                  |                |               | X                    | X               |           |       |          |           |
| Shivalingappa (2015) | Airway Exposure to E-Cigarette Vapors Impairs Autophagy and Induces Aggresome Formation.                                                                                      |                  | X              |               |                      |                 |           |       |          |           |
| Siegel (2011)        | Electronic cigarettes as a smoking-cessation: tool results from an online survey.                                                                                             |                  |                |               |                      |                 |           |       |          | X         |
| Silver (2016)        | Successful use of nicotine replacement therapy to quit e-cigarettes: lack of treatment protocol highlights need for guidelines.                                               |                  |                |               |                      |                 |           |       |          | X         |
| Singh (2016)         | Tobacco Use Among Middle and High School Students - United States, 2011-2015.                                                                                                 |                  |                |               |                      | X               |           |       |          |           |
| Singh (2016)         | Exposure to Advertisements and Electronic Cigarette Use Among US Middle and High School Students.                                                                             |                  |                |               |                      |                 | X         |       |          |           |
| Singh (2016)         | Vital Signs: Exposure to Electronic Cigarette Advertising Among Middle School and High School Students - United States, 2014.                                                 |                  |                |               |                      |                 | X         |       |          |           |
| Smith (2015)         | Adult Behavior in Male Mice Exposed to E-Cigarette Nicotine Vapors during Late Prenatal and Early Postnatal Life.                                                             |                  | X              |               |                      |                 |           |       |          |           |
| Sommerfeld (2016)    | Intravenous and oral suicidal e-liquid poisonings with confirmed nicotine and cotinine concentrations.                                                                        |                  | X              |               |                      |                 |           |       |          |           |
| Soneji (2014)        | Multiple tobacco product use among US adolescents and young adults.                                                                                                           |                  |                |               |                      | X               |           |       |          |           |



**Appendix**  
**Overview of Electronic Nicotine Delivery Systems: A Systematic Review**  
**Glasser et al.**

|                  |                                                                                                                                                                                               | Product features | Health effects | Addictiveness | Consumer perceptions | Patterns of use | Marketing | Sales | Policies | Cessation |
|------------------|-----------------------------------------------------------------------------------------------------------------------------------------------------------------------------------------------|------------------|----------------|---------------|----------------------|-----------------|-----------|-------|----------|-----------|
| Soneji (2016)    | Online Electronic Cigarette Marketing-Violation of Self-regulated Standards by Tobacco Companies.                                                                                             |                  |                |               |                      |                 |           | X     |          |           |
| Sosnowski (2016) | Predicted Deposition of E-Cigarette Aerosol in the Human Lungs.                                                                                                                               | X                |                |               |                      |                 |           |       |          |           |
| Soule (2015)     | Adverse Effects of Electronic Cigarette Use: A Concept Mapping Approach.                                                                                                                      |                  | X              |               | X                    |                 |           |       |          |           |
| Soule (2016)     | Electronic cigarette use and indoor air quality in a natural setting.                                                                                                                         | X                |                |               |                      |                 |           |       |          |           |
| Soule (2016)     | Reasons for electronic cigarette use beyond cigarette smoking cessation: A concept mapping approach.                                                                                          |                  | X              |               | X                    |                 |           |       |          |           |
| Spindle (2015)   | Preliminary results of an examination of electronic cigarette user puff topography: the effect of a mouthpiece-based topography measurement device on plasma nicotine and subjective effects. |                  | X              | X             |                      | X               |           |       |          |           |
| St Helen (2016)  | Nicotine delivery, retention and pharmacokinetics from various electronic cigarettes.                                                                                                         |                  | X              | X             |                      |                 |           |       |          |           |
| Stafford (2012)  | Hanover bans e-cigarette use in civic offices amid calls for better safety data.                                                                                                              |                  |                |               |                      |                 |           |       | X        |           |
| Stein (2015)     | E-cigarette Knowledge, Attitudes, and Use in Opioid Dependent Smokers.                                                                                                                        |                  |                |               |                      |                 |           |       |          | X         |
| Stein (2015)     | An Open Trial of Electronic Cigarettes for Smoking Cessation Among Methadone-Maintained Smokers.                                                                                              |                  |                |               |                      |                 |           |       |          | X         |
| Steinberg (2014) | E-cigarette versus nicotine inhaler: comparing the perceptions and experiences of inhaled nicotine devices.                                                                                   |                  |                |               | X                    |                 |           |       |          |           |
| Stepanov (2015)  | Bringing attention to e-cigarette pH as an important element for research and regulation.                                                                                                     | X                |                |               |                      |                 |           |       |          |           |
| Stillman (2015)  | E-cigarette use in air transit: self-reported data from US flight attendants.                                                                                                                 |                  |                |               |                      | X               |           |       |          |           |
| Stoklosa (2016)  | Prices and E-Cigarette Demand: Evidence From the European Union.                                                                                                                              |                  |                |               |                      |                 |           | X     |          |           |
| Strong (2015)    | Gender differences influence overweight smokers' experimentation with electronic nicotine delivery systems.                                                                                   |                  |                |               |                      | X               |           |       |          |           |

**Appendix**  
**Overview of Electronic Nicotine Delivery Systems: A Systematic Review**  
**Glasser et al.**

|                         |                                                                                                                                                                                                                 | Product features | Health effects | Addictiveness | Consumer perceptions | Patterns of use | Marketing | Sales | Policies | Cessation |
|-------------------------|-----------------------------------------------------------------------------------------------------------------------------------------------------------------------------------------------------------------|------------------|----------------|---------------|----------------------|-----------------|-----------|-------|----------|-----------|
| Surís (2015)            | Reasons to use e-cigarettes and associations with other substances among adolescents in Switzerland.                                                                                                            |                  |                |               | X                    | X               |           |       |          |           |
| Sussan (2015)           | Exposure to electronic cigarettes impairs pulmonary anti-bacterial and anti-viral defenses in a mouse model.                                                                                                    |                  | X              |               |                      |                 |           |       |          |           |
| Sussman (2014)          | Consumers' perceptions of vape shops in Southern California: an analysis of online Yelp reviews.                                                                                                                |                  |                |               | X                    |                 | X         |       |          |           |
| Sussman (2016)          | Who walks into vape shops in Southern California?: a naturalistic observation of customers.                                                                                                                     |                  |                |               |                      |                 |           | X     |          |           |
| Sutfin (2013)           | Electronic cigarette use by college students.                                                                                                                                                                   |                  |                |               | X                    | X               |           |       |          |           |
| Sutfin (2015)           | The Impact of Trying Electronic Cigarettes on Cigarette Smoking by College Students: A Prospective Analysis.                                                                                                    |                  |                |               | X                    | X               |           |       |          |           |
| Sutherland (2016)       | Tobacco and e-cigarette use amongst illicit drug users in Australia.                                                                                                                                            |                  |                |               |                      | X               |           |       |          |           |
| Szołtysek-Bołdys (2014) | Influence of inhaled nicotine source on arterial stiffness.                                                                                                                                                     |                  | X              |               |                      |                 |           |       |          |           |
| Tabuchi (2016)          | Awareness and use of electronic cigarettes and heat-not-burn tobacco products in Japan.                                                                                                                         |                  |                |               | X                    | X               |           |       |          |           |
| Tackett (2015)          | Biochemically verified smoking cessation and vaping beliefs among vape store customers.                                                                                                                         |                  |                |               |                      | X               |           |       |          | X         |
| Talih (2015)            | Effects of user puff topography, device voltage, and liquid nicotine concentration on electronic cigarette nicotine yield: measurements and model predictions.                                                  | X                |                |               |                      | X               |           |       |          |           |
| Talih (2015)            | "Direct Dripping": A High-Temperature, High-Formaldehyde Emission Electronic Cigarette Use Method.                                                                                                              | X                |                |               |                      |                 |           |       |          |           |
| Tamí-Maury (2015)       | A pilot study to assess tobacco use among sexual minorities in Houston, Texas.                                                                                                                                  |                  |                |               |                      | X               |           |       |          |           |
| Tan (2014)              | Sociodemographic correlates of self-reported exposure to e-cigarette communications and its association with public support for smoke-free and vape-free policies: results from a national survey of US adults. |                  |                |               |                      |                 |           |       | X        |           |

**Appendix**  
**Overview of Electronic Nicotine Delivery Systems: A Systematic Review**  
**Glasser et al.**

|                    |                                                                                                                                                                                                                   | Product features | Health effects | Addictiveness | Consumer perceptions | Patterns of use | Marketing | Sales | Policies | Cessation |
|--------------------|-------------------------------------------------------------------------------------------------------------------------------------------------------------------------------------------------------------------|------------------|----------------|---------------|----------------------|-----------------|-----------|-------|----------|-----------|
| Tan (2014)         | E-cigarette awareness and perceived harmfulness: prevalence and associations with smoking-cessation outcomes.                                                                                                     |                  |                |               | X                    |                 |           |       |          |           |
| Tan (2015)         | Public support for selected e-cigarette regulations and associations with overall information exposure and contradictory information exposure about e-cigarettes: Findings from a national survey of U.S. adults. |                  |                |               |                      |                 | X         |       | X        |           |
| Tan (2015)         | Is exposure to e-cigarette communication associated with perceived harms of e-cigarette secondhand vapour? Results from a national survey of US adults.                                                           |                  |                |               | X                    |                 |           |       |          |           |
| Tan (2016)         | Comparison of beliefs about e-cigarettes' harms and benefits among never users and ever users of e-cigarettes.                                                                                                    |                  |                |               | X                    |                 |           |       |          |           |
| Tavolacci (2016)   | Patterns of electronic cigarette use in current and ever users among college students in France: a cross-sectional study.                                                                                         |                  |                |               | X                    | X               |           |       |          |           |
| Tayyarah (2014)    | Comparison of select analytes in aerosol from e-cigarettes with smoke from conventional cigarettes and with ambient air.                                                                                          | X                |                |               |                      |                 |           |       |          |           |
| Teasdale (2016)    | Cigarette smoke but not electronic cigarette aerosol activates a stress response in human coronary artery endothelial cells in culture.                                                                           |                  | X              |               |                      |                 |           |       |          |           |
| Thornton (2014)    | Fatal intravenous injection of electronic nicotine delivery system refilling solution.                                                                                                                            |                  | X              |               |                      |                 |           |       |          |           |
| Thota (2014)       | Case report of electronic cigarettes possibly associated with eosinophilic pneumonitis in a previously healthy active-duty sailor.                                                                                |                  | X              |               |                      |                 |           |       |          |           |
| Thrasher (2016)    | Prevalence and Correlates of E-Cigarette Perceptions and Trial Among Early Adolescents in Mexico.                                                                                                                 |                  |                |               | X                    | X               |           |       |          |           |
| Tierney (2015)     | Flavour chemicals in electronic cigarette fluids.                                                                                                                                                                 | X                |                |               |                      |                 |           |       |          |           |
| Trtchounian (2010) | Conventional and electronic cigarettes (e-cigarettes) have different smoking characteristics.                                                                                                                     | X                |                |               |                      |                 |           |       |          |           |
| Trtchounian (2010) | Electronic nicotine delivery systems: is there a need for regulation?                                                                                                                                             | X                |                |               |                      |                 |           |       |          |           |
| Trumbo (2013)      | Use and perception of electronic cigarettes among college students.                                                                                                                                               |                  |                |               | X                    |                 |           |       | X        |           |

**Appendix**  
**Overview of Electronic Nicotine Delivery Systems: A Systematic Review**  
**Glasser et al.**

|                       |                                                                                                                                                                                                                      | Product features | Health effects | Addictiveness | Consumer perceptions | Patterns of use | Marketing | Sales | Policies | Cessation |
|-----------------------|----------------------------------------------------------------------------------------------------------------------------------------------------------------------------------------------------------------------|------------------|----------------|---------------|----------------------|-----------------|-----------|-------|----------|-----------|
| Trumbo (2015)         | The effect of electronic cigarette advertising on intended use among college students.                                                                                                                               |                  |                |               | X                    |                 | X         |       |          |           |
| Tsai (2015)           | Portrayal of tobacco in Mongolian language YouTube videos: policy gaps.                                                                                                                                              |                  |                |               |                      |                 | X         |       |          |           |
| Tseng (2016)          | A Randomized Trial Comparing the Effect of Nicotine Versus Placebo Electronic Cigarettes on Smoking Reduction Among Young Adult Smokers.                                                                             |                  |                |               |                      |                 |           |       |          | X         |
| Tuchman (2016)        | Advertising and Demand for Addictive Goods: The Effects of E-Cigarette Advertising                                                                                                                                   |                  |                |               |                      |                 |           |       | X        |           |
| Tucker (2014)         | Alternative tobacco product use and smoking cessation among homeless youth in los angeles county.                                                                                                                    |                  |                |               | X                    | X               |           |       |          |           |
| Twyman (2015)         | Electronic Cigarettes: Awareness, Recent Use, and Attitudes Within a Sample of Socioeconomically Disadvantaged Australian Smokers.                                                                                   |                  |                |               | X                    | X               |           |       |          |           |
| Tzatzarakis (2013)    | Acute and short term impact of active and passive tobacco and electronic cigarette smoking on inflammatory markers. [Abstract]                                                                                       |                  | X              |               |                      |                 |           |       |          |           |
| Uchiyama (2013)       | Determination of carbonyl compounds generated from the E-cigarette using coupled silica cartridges impregnated with hydroquinone and 2,4-dinitrophenylhydrazine, followed by high-performance liquid chromatography. | X                |                |               |                      |                 |           |       |          |           |
| Unger (2016)          | E-cigarette use and subsequent cigarette and marijuana use among Hispanic young adults.                                                                                                                              |                  |                |               |                      | X               |           |       |          |           |
| Unger (2016)          | Support for electronic cigarette regulations among California voters.                                                                                                                                                |                  |                |               |                      |                 |           |       | X        |           |
| Vakkalanka (2014)     | Epidemiological trends in electronic cigarette exposures reported to U.S. Poison Centers.                                                                                                                            |                  | X              |               |                      |                 |           |       |          |           |
| Valentine (2016)      | The effects of alcohol-containing e-cigarettes on young adult smokers.                                                                                                                                               |                  | X              |               |                      |                 |           |       |          |           |
| van der Tempel (2016) | Vape, quit, tweet? Electronic cigarettes and smoking cessation on Twitter.                                                                                                                                           |                  |                |               |                      |                 | X         |       |          |           |
| van Staden (2013)     | Carboxyhaemoglobin levels, health and lifestyle perceptions in smokers converting from tobacco cigarettes to electronic cigarettes.                                                                                  |                  | X              | X             |                      |                 |           |       |          |           |
| VanDevanter (2016)    | Knowledge, Beliefs, Behaviors, and Social Norms Related to Use of Alternative Tobacco                                                                                                                                |                  |                |               | X                    | X               |           |       |          |           |

**Appendix**  
**Overview of Electronic Nicotine Delivery Systems: A Systematic Review**  
**Glasser et al.**

|                            |                                                                                                                                                                               | Product features | Health effects | Addictiveness | Consumer perceptions | Patterns of use | Marketing | Sales | Policies | Cessation |
|----------------------------|-------------------------------------------------------------------------------------------------------------------------------------------------------------------------------|------------------|----------------|---------------|----------------------|-----------------|-----------|-------|----------|-----------|
|                            | Products Among Undergraduate and Graduate Nursing Students in an Urban U.S. University Setting.                                                                               |                  |                |               |                      |                 |           |       |          |           |
| Vannier (2015)             | Reversible cerebral vasoconstriction syndrome triggered by an electronic cigarette: case report.                                                                              |                  | X              |               |                      |                 |           |       |          |           |
| Vansickel (2010)           | A clinical laboratory model for evaluating the acute effects of electronic "cigarettes": nicotine delivery profile and cardiovascular and subjective effects.                 |                  | X              | X             |                      |                 |           |       |          |           |
| Vansickel (2012)           | Clinical laboratory assessment of the abuse liability of an electronic cigarette.                                                                                             |                  | X              | X             |                      |                 |           |       |          |           |
| Vansickel (2013)           | Electronic cigarettes: effective nicotine delivery after acute administration.                                                                                                |                  | X              | X             |                      |                 |           |       |          |           |
| Vardavas (2012)            | Short-term pulmonary effects of using an electronic cigarette: impact on respiratory flow resistance, impedance, and exhaled nitric oxide.                                    |                  | X              |               |                      |                 |           |       |          |           |
| Vardavas (2015)            | Determinants and prevalence of e-cigarette use throughout the European Union: a secondary analysis of 26 566 youth and adults from 27 Countries.                              |                  |                |               |                      | X               |           |       |          |           |
| Vasiljevic (2016)          | Impact of advertisements promoting candy-like flavoured e-cigarettes on appeal of tobacco smoking among children: an experimental study.                                      |                  |                |               |                      |                 | X         |       |          |           |
| Vélez de Mendizábal (2015) | Nicotine and cotinine exposure from electronic cigarettes: a population approach.                                                                                             |                  |                | X             |                      |                 |           |       |          |           |
| Vickerman (2013)           | Use of electronic cigarettes among state tobacco cessation quitline callers.                                                                                                  |                  |                |               | X                    | X               |           |       |          | X         |
| Vickerman (2016)           | Reasons for Electronic Nicotine Delivery System use and smoking abstinence at 6 months: a descriptive study of callers to employer and health plan-sponsored quitlines.       |                  |                |               |                      |                 |           |       |          | X         |
| Villanti (2016)            | Impact of Exposure to Electronic Cigarette Advertising on Susceptibility and Trial of Electronic Cigarettes and Cigarettes in US Young Adults: A Randomized Controlled Trial. |                  |                |               |                      |                 | X         |       |          |           |
| Wackowski (2015)           | Switching to E-Cigarettes in the Event of a Menthol Cigarette Ban.                                                                                                            |                  |                |               |                      |                 |           |       | X        |           |
| Wackowski (2015)           | Young Adults' Risk Perceptions of Various Tobacco Products Relative to Cigarettes: Results From the National Young Adult Health Survey.                                       |                  |                |               | X                    | X               |           |       |          |           |

**Appendix**  
**Overview of Electronic Nicotine Delivery Systems: A Systematic Review**  
**Glasser et al.**

|                  |                                                                                                                                                                   | Product features | Health effects | Addictiveness | Consumer perceptions | Patterns of use | Marketing | Sales | Policies | Cessation |
|------------------|-------------------------------------------------------------------------------------------------------------------------------------------------------------------|------------------|----------------|---------------|----------------------|-----------------|-----------|-------|----------|-----------|
| Wackowski (2015) | Smokers' attitudes and support for e-cigarette policies and regulation in the USA.                                                                                |                  |                |               | X                    | X               |           |       | X        |           |
| Wagener (2014)   | Pilot investigation of changes in readiness and confidence to quit smoking after E-cigarette experimentation and 1 week of use.                                   |                  | X              | X             |                      |                 |           |       |          | X         |
| Wagoner (2014)   | E-cigarette availability and promotion among retail outlets near college campuses in two southeastern states.                                                     |                  |                |               |                      |                 | X         |       |          |           |
| Wagoner (2016)   | E-cigarettes, hookah pens and vapes: Adolescent and young adult perceptions of Electronic Nicotine Delivery Systems.                                              |                  |                |               | X                    |                 | X         |       |          |           |
| Walele (2016)    | A randomised, crossover study on an electronic vapour product, a nicotine inhalator and a conventional cigarette. Part B: Safety and subjective effects.          |                  | X              | X             |                      |                 |           |       |          |           |
| Walele (2016)    | A randomised, crossover study on an electronic vapour product, a nicotine inhalator and a conventional cigarette. Part A: Pharmacokinetics.                       |                  |                | X             |                      |                 |           |       |          |           |
| Wang (2014)      | Awareness and use of non-conventional tobacco products among U.S. students, 2012.                                                                                 |                  |                |               | X                    | X               |           |       |          |           |
| Wang (2015)      | E-Cigarette Awareness, Perceptions and Use among Community-Recruited Smokers in Hong Kong.                                                                        |                  |                |               | X                    | X               |           |       |          |           |
| Wang (2015)      | An Examination of Electronic Cigarette Content on Social Media: Analysis of E-Cigarette Flavor Content on Reddit.                                                 |                  |                |               |                      |                 | X         |       |          |           |
| Wang (2015)      | Electronic cigarette use and its association with smoking in Hong Kong Chinese adolescents.                                                                       |                  |                |               |                      | X               |           |       |          |           |
| Wang (2016)      | Electronic Cigarette Use and Respiratory Symptoms in Chinese Adolescents in Hong Kong.                                                                            |                  | X              |               |                      | X               |           |       |          |           |
| Warner (2016)    | Frequency of E-Cigarette Use and Cigarette Smoking by American Students in 2014.                                                                                  |                  |                |               |                      | X               |           |       |          |           |
| Weaver (2016)    | Use of electronic nicotine delivery systems and other tobacco products among USA adults, 2014: results from a national survey.                                    |                  |                |               |                      | X               |           |       |          |           |
| Weishaar (2016)  | "Maybe they should regulate them quite strictly until they know the true dangers": A focus group study exploring UK adolescents' views on e-cigarette regulation. |                  |                |               |                      |                 |           |       | X        |           |

**Appendix**  
**Overview of Electronic Nicotine Delivery Systems: A Systematic Review**  
**Glasser et al.**

|                      |                                                                                                                           | Product features | Health effects | Addictiveness | Consumer perceptions | Patterns of use | Marketing | Sales | Policies | Cessation |
|----------------------|---------------------------------------------------------------------------------------------------------------------------|------------------|----------------|---------------|----------------------|-----------------|-----------|-------|----------|-----------|
| Westenberger, (2009) | Evaluation of e-cigarettes                                                                                                | X                |                |               |                      |                 |           |       |          |           |
| White (2015)         | Tripling use of electronic cigarettes among new zealand adolescents between 2012 and 2014.                                |                  |                |               |                      | X               |           |       |          |           |
| Willershausen (2014) | Influence of E-smoking liquids on human periodontal ligament fibroblasts.                                                 |                  | X              |               |                      |                 |           |       |          |           |
| Williams (2011)      | Variability among electronic cigarettes in the pressure drop, airflow rate, and aerosol production.                       | X                |                |               |                      |                 |           |       |          |           |
| Williams (2013)      | Metal and silicate particles including nanoparticles are present in electronic cigarette cartomizer fluid and aerosol.    | X                | X              |               |                      |                 |           |       |          |           |
| Williams (2015)      | Disposable electronic cigarettes and electronic hookahs: evaluation of performance.                                       | X                |                |               |                      |                 |           |       |          |           |
| Williams (2015)      | VapeCons: E-cigarette user conventions.                                                                                   |                  |                |               |                      |                 | X         |       |          |           |
| Williams (2015)      | Strategies to Reduce Tin and Other Metals in Electronic Cigarette Aerosol.                                                | X                |                |               |                      |                 |           |       |          |           |
| Williams (2015)      | Electronic cigarette sales to minors via the internet.                                                                    |                  |                |               |                      |                 |           | X     |          |           |
| Williams (2016)      | Comparison of the Performance of Cartomizer Style Electronic Cigarettes from Major Tobacco and Independent Manufacturers. | X                |                |               |                      |                 |           |       |          |           |
| Wills (2015)         | Risk factors for exclusive e-cigarette use and dual e-cigarette use and tobacco use in adolescents.                       |                  |                |               |                      | X               |           |       |          |           |
| Wills (2015)         | E-cigarette use and willingness to smoke: a sample of adolescent non-smokers.                                             |                  |                |               |                      | X               |           |       |          |           |
| Wills (2016)         | Longitudinal study of e-cigarette use and onset of cigarette smoking among high school students in Hawaii.                |                  |                |               |                      | X               |           |       |          |           |
| Wiseman (2016)       | Adolescents' and Young Adults' Knowledge and Beliefs About Constituents in Novel Tobacco Products.                        |                  |                |               | X                    |                 |           |       |          |           |
| Wong (2016)          | Reasons for Using Electronic Cigarettes and Intentions to Quit Among Electronic Cigarette Users in Malaysia.              |                  |                |               | X                    | X               |           |       |          |           |
| Wu (2014)            | Electronic cigarette liquid increases inflammation and virus infection in primary human airway epithelial cells.          |                  | X              |               |                      |                 |           |       |          |           |

**Appendix**  
**Overview of Electronic Nicotine Delivery Systems: A Systematic Review**  
**Glasser et al.**

|                     |                                                                                                                                                                                                         | Product features | Health effects | Addictiveness | Consumer perceptions | Patterns of use | Marketing | Sales | Policies | Cessation |
|---------------------|---------------------------------------------------------------------------------------------------------------------------------------------------------------------------------------------------------|------------------|----------------|---------------|----------------------|-----------------|-----------|-------|----------|-----------|
| Yan (2015)          | Effects of using electronic cigarettes on nicotine delivery and cardiovascular function in comparison with regular cigarettes.                                                                          |                  | X              | X             |                      |                 |           |       |          |           |
| Yao (2014)          | A content analysis of electronic cigarette manufacturer websites in China.                                                                                                                              |                  |                |               |                      |                 | X         |       |          |           |
| Yingst (2015)       | Factors Associated With Electronic Cigarette Users' Device Preferences and Transition From First Generation to Advanced Generation Devices.                                                             |                  |                |               |                      | X               |           |       |          |           |
| Yong (2015)         | Trends in E-Cigarette Awareness, Trial, and Use Under the Different Regulatory Environments of Australia and the United Kingdom.                                                                        |                  |                |               | X                    | X               |           |       |          |           |
| Yong (2016)         | Prevalence and Correlates of the Belief That Electronic Cigarettes are a Lot Less Harmful Than Conventional Cigarettes Under the Different Regulatory Environments of Australia and the United Kingdom. |                  |                |               | X                    |                 |           |       |          |           |
| Yu (2016)           | Electronic cigarettes induce DNA strand breaks and cell death independently of nicotine in cell lines.                                                                                                  |                  | X              |               |                      |                 |           |       |          |           |
| Zarobkiewicz (2016) | Tobacco smokers and electronic cigarettes users among Polish universities students.                                                                                                                     |                  |                |               | X                    | X               |           |       |          |           |
| Zhang (2013)        | In vitro particle size distributions in electronic and conventional cigarette aerosols suggest comparable deposition patterns.                                                                          | X                |                |               |                      |                 |           |       |          |           |
| Zhang (2016)        | E-cigarette use among US adolescents: secondhand smoke at home matters.                                                                                                                                 |                  |                |               |                      | X               |           |       |          |           |
| Zhou (2015)         | A Study of the Use, Knowledge, and Beliefs About Cigarettes and Alternative Tobacco Products Among Students at One U.S. Medical School.                                                                 |                  |                |               | X                    | X               |           |       |          |           |
| Zhu (2013)          | The use and perception of electronic cigarettes and snus among the U.S. population.                                                                                                                     |                  |                |               | X                    | X               | X         |       |          | X         |
| Zhu (2014)          | Four hundred and sixty brands of e-cigarettes and counting: implications for product regulation.                                                                                                        |                  |                |               |                      |                 |           | X     |          |           |



**Appendix Table 3.** Study Design and Outcomes Assessed for Studies Relevant to Smoking Cessation and Vaping.

| <b>Outcome</b>                              | <b>Study design</b>                                                                                                                                                                                                                                                                                                                                                                                                              |
|---------------------------------------------|----------------------------------------------------------------------------------------------------------------------------------------------------------------------------------------------------------------------------------------------------------------------------------------------------------------------------------------------------------------------------------------------------------------------------------|
| Abstinence and/or cigarette reduction       | <ul style="list-style-type: none"> <li>• RCTs (N=5)<sup>1-5</sup></li> <li>• Longitudinal observational study with a comparison group (N=13)<sup>6-18</sup></li> <li>• Clinical laboratory study (N=2)<sup>19,20</sup></li> <li>• Longitudinal observational study with no comparison group (N=15)<sup>21-35</sup></li> <li>• Cross-sectional survey (N=22)<sup>36-57</sup></li> <li>• Case series (N=1)<sup>58</sup></li> </ul> |
| ENDS nicotine concentration during quitting | <ul style="list-style-type: none"> <li>• Cross-sectional survey (N=1)<sup>59</sup></li> </ul>                                                                                                                                                                                                                                                                                                                                    |
| Reasons for vaping                          | <ul style="list-style-type: none"> <li>• Cross-sectional survey (N=1)<sup>60</sup></li> </ul>                                                                                                                                                                                                                                                                                                                                    |
| Use of ENDS as a quit method                | <ul style="list-style-type: none"> <li>• Cross-sectional survey (N=6)<sup>61-66</sup></li> <li>• Repeated cross-sectional survey (N=1)<sup>67</sup></li> </ul>                                                                                                                                                                                                                                                                   |
| Quit attempts                               | <ul style="list-style-type: none"> <li>• Cross-sectional survey (N=3)<sup>68-70</sup></li> </ul>                                                                                                                                                                                                                                                                                                                                 |
| Intention to quit                           | <ul style="list-style-type: none"> <li>• Cross-sectional survey (N=2)<sup>71,72</sup></li> </ul>                                                                                                                                                                                                                                                                                                                                 |
| Cessation of vaping                         | <ul style="list-style-type: none"> <li>• Case series (N=1)<sup>73</sup></li> </ul>                                                                                                                                                                                                                                                                                                                                               |

ENDS, electronic nicotine delivery systems

## REFERENCES

1. Caponnetto P, Campagna D, Cibella F, et al. Efficiency and Safety of an eElectronic cigarette (ECLAT) as tobacco cigarettes substitute: a prospective 12-month randomized control design study. *PLoS One*. 2013;8(6):e66317.
2. Adriaens K, Van Gucht D, Declerck P, Baeyens F. Effectiveness of the electronic cigarette: An eight-week Flemish study with six-month follow-up on smoking reduction, craving and experienced benefits and complaints. *Int J Environ Res Public Health*. 2014;11(11):11220-11248.
3. Bullen C, Howe C, Laugesen M, et al. Electronic cigarettes for smoking cessation: a randomised controlled trial. *Lancet*. 2013;382(9905):1629-1637.
4. O'Brien B, Knight-West O, Walker N, Parag V, Bullen C. E-cigarettes versus NRT for smoking reduction or cessation in people with mental illness: secondary analysis of data from the ASCEND trial. *Tob Induc Dis*. 2015;13(1):5.
5. Tseng TY, Ostroff JS, Campo A, et al. A Randomized Trial Comparing the Effect of Nicotine Versus Placebo Electronic Cigarettes on Smoking Reduction Among Young Adult Smokers. *Nicotine Tob Res*. 2016.
6. Manzoli L, Flacco ME, Fiore M, et al. Electronic Cigarettes Efficacy and Safety at 12 Months: Cohort Study. *PLoS One*. 2015;10(6):e0129443.
7. Adkison SE, O'Connor RJ, Bansal-Travers M, et al. Electronic nicotine delivery systems: international tobacco control four-country survey. *Am J Prev Med*. 2013;44(3):207-215.
8. Vickerman KA, Carpenter KM, Altman T, Nash CM, Zbikowski SM. Use of electronic cigarettes among state tobacco cessation quitline callers. *Nicotine Tob Res*. 2013;15(10):1787-1791.

9. Biener L, Hargraves JL. A longitudinal study of electronic cigarette use among a population-based sample of adult smokers: association with smoking cessation and motivation to quit. *Nicotine Tob Res.* 2015;17(2):127-133.
10. Brose LS, Hitchman SC, Brown J, West R, McNeill A. Is the use of electronic cigarettes while smoking associated with smoking cessation attempts, cessation and reduced cigarette consumption? A survey with a 1-year follow-up. *Addiction.* 2015;110(7):1160-1168.
11. Choi K, Forster JL. Authors' response. *Am J Prev Med.* 2014;46(6):e58-59.
12. Hitchman SC, Brose LS, Brown J, Robson D, McNeill A. Associations Between E-Cigarette Type, Frequency of Use, and Quitting Smoking: Findings From a Longitudinal Online Panel Survey in Great Britain. *Nicotine Tob Res.* 2015.
13. Prochaska JJ, Grana RA. E-Cigarette Use among Smokers with Serious Mental Illness. *PLoS One.* 2014;9(11):e113013.
14. Vickerman KA, Schauer GL, Malarcher AM, Zhang L, Mowery P, Nash CM. Reasons for Electronic Nicotine Delivery System use and smoking abstinence at 6 months: a descriptive study of callers to employer and health plan-sponsored quitlines. *Tob Control.* 2016.
15. Grana RA, Popova L, Ling PM. A Longitudinal Analysis of Electronic Cigarette Use and Smoking Cessation. *JAMA Intern Med.* 2014.
16. Borderud SP, Li Y, Burkhalter JE, Sheffer CE, Ostroff JS. Electronic cigarette use among patients with cancer: Characteristics of electronic cigarette users and their smoking cessation outcomes. *Cancer.* 2014.

**Appendix**  
**Overview of Electronic Nicotine Delivery Systems: A Systematic Review**  
**Glasser et al.**

17. Al-Delaimy WK, Myers MG, Leas EC, Strong DR, Hofstetter CR. E-cigarette use in the past and quitting behavior in the future: a population-based study. *Am J Public Health.* 2015;105(6):1213-1219.
18. Pearson JL, Stanton CA, Cha S, Niaura RS, Luta G, Graham AL. E-Cigarettes and Smoking Cessation: Insights and Cautions From a Secondary Analysis of Data From a Study of Online Treatment-Seeking Smokers. *Nicotine Tob Res.* 2015;17(10):1219-1227.
19. Wagener TL, Meier E, Hale JJ, et al. Pilot investigation of changes in readiness and confidence to quit smoking after E-cigarette experimentation and 1 week of use. *Nicotine Tob Res.* 2014;16(1):108-114.
20. McRobbie H, Phillips A, Goniewicz ML, et al. Effects of Switching to Electronic Cigarettes with and without Concurrent Smoking on Exposure to Nicotine, Carbon Monoxide, and Acrolein. *Cancer Prev Res (Phila).* 2015;8(9):873-878.
21. Berg CJ, Barr DB, Stratton E, Escoffery C, Kegler M. Attitudes toward E-Cigarettes, Reasons for Initiating E-Cigarette Use, and Changes in Smoking Behavior after Initiation: A Pilot Longitudinal Study of Regular Cigarette Smokers. *Open J Prev Med.* 2014;4(10):789-800.
22. Etter JF, Bullen C. A longitudinal study of electronic cigarette users. *Addict Behav.* 2014;39(2):491-494.
23. Caponnetto P, Auditore R, Russo C, Cappello GC, Polosa R. Impact of an electronic cigarette on smoking reduction and cessation in schizophrenic smokers: a prospective 12-month pilot study. *Int J Environ Res Public Health.* 2013;10(2):446-461.

24. Polosa R, Caponnetto P, Morjaria JB, Papale G, Campagna D, Russo C. Effect of an electronic nicotine delivery device (e-Cigarette) on smoking reduction and cessation: a prospective 6-month pilot study. *BMC Public Health*. 2011;11:786.
25. Polosa R, Morjaria JB, Caponnetto P, et al. Effectiveness and tolerability of electronic cigarette in real-life: a 24-month prospective observational study. *Intern Emerg Med*. 2014;9(5):537-546.
26. Polosa R, Caponnetto P, Maglia M, Morjaria JB, Russo C. Success rates with nicotine personal vaporizers: a prospective 6-month pilot study of smokers not intending to quit. *BMC Public Health*. 2014;14:1159.
27. Nides MA, Leischow SJ, Bhattar M, Simmons M. Nicotine blood levels and short-term smoking reduction with an electronic nicotine delivery system. *American Journal of Health Behavior*. 2014;38(2):265-274.
28. Grace RC, Kivell BM, Laugesen M. Gender differences in satisfaction ratings for nicotine electronic cigarettes by first-time users. *Addict Behav*. 2015;50:140-143.
29. Polosa R, Caponnetto P, Cibella F, Le-Houezec J. Quit and smoking reduction rates in vape shop consumers: a prospective 12-month survey. *Int J Environ Res Public Health*. 2015;12(4):3428-3438.
30. Pacifici R, Pichini S, Graziano S, Pellegrini M, Massaro G, Beatrice F. Successful Nicotine Intake in Medical Assisted Use of E-Cigarettes: A Pilot Study. *Int J Environ Res Public Health*. 2015;12(7):7638-7646.
31. Nolan M, Leischow S, Croghan I, et al. Feasibility of Electronic Nicotine Delivery Systems in Surgical Patients. *Nicotine Tob Res*. 2016.

**Appendix**  
**Overview of Electronic Nicotine Delivery Systems: A Systematic Review**  
**Glasser et al.**

32. Polosa R, Morjaria JB, Caponnetto P, et al. Persisting long term benefits of smoking abstinence and reduction in asthmatic smokers who have switched to electronic cigarettes. *Discov Med.* 2016;21(114):99-108.
33. Pratt SI, Sargent J, Daniels L, Santos MM, Brunette M. Appeal of electronic cigarettes in smokers with serious mental illness. *Addict Behav.* 2016;59:30-34.
34. Stein MD, Caviness C, Grimone K, Audet D, Anderson BJ, Bailey GL. An Open Trial of Electronic Cigarettes for Smoking Cessation Among Methadone-Maintained Smokers. *Nicotine Tob Res.* 2015.
35. James SA, Meier EM, Wagener TL, Smith KM, Neas BR, Beebe LA. E-Cigarettes for Immediate Smoking Substitution in Women Diagnosed with Cervical Dysplasia and Associated Disorders. *Int J Environ Res Public Health.* 2016;13(3).
36. Goniewicz ML, Lingas EO, Hajek P. Patterns of electronic cigarette use and user beliefs about their safety and benefits: an Internet survey. *Drug Alcohol Rev.* 2013;32(2):133-140.
37. Dawkins L, Turner J, Roberts A, Soar K. 'Vaping' profiles and preferences: an online survey of electronic cigarette users. *Addiction.* 2013;108(6):1115-1125.
38. Tackett AP, Lechner WV, Meier E, et al. Biochemically verified smoking cessation and vaping beliefs among vape store customers. *Addiction.* 2015.
39. Rutten LJ, Blake KD, Agunwamba AA, et al. Use of e-Cigarettes among Current Smokers: Associations among Reasons for Use, Quit Intentions, and Current Tobacco Use. *Nicotine & Tobacco Research.* 2015.
40. Siegel MB, Tanwar KL, Wood KS. Electronic cigarettes as a smoking-cessation: tool results from an online survey. *Am J Prev Med.* 2011;40(4):472-475.

41. Farsalinos KE, Romagna G, Tsiapras D, Kyrzopoulos S, Spyrou A, Voudris V. Impact of flavour variability on electronic cigarette use experience: an internet survey. *Int J Environ Res Public Health*. 2013;10(12):7272-7282.
42. Zhu SH, Gamst A, Lee M, Cummins S, Yin L, Zoref L. The Use and Perception of Electronic Cigarettes and Snus among the U.S. Population. *PLoS One*. 2013;8(10):e79332.
43. Brown J, Beard E, Kotz D, Michie S, West R. Real-world effectiveness of e-cigarettes when used to aid smoking cessation: a cross-sectional population study. *Addiction*. 2014;109(9):1531-1540.
44. Popova L, Ling PM. Alternative tobacco product use and smoking cessation: a national study. *Am J Public Health*. 2013;103(5):923-930.
45. Lee S, Grana RA, Glantz SA. Electronic cigarette use among Korean adolescents: a cross-sectional study of market penetration, dual use, and relationship to quit attempts and former smoking. *The Journal of Adolescent Health*. 2014;54(6):684-690.
46. Christensen T, Welsh E, Faseru B. Profile of e-cigarette use and its relationship with cigarette quit attempts and abstinence in Kansas adults. *Prev Med*. 2014;69C:90-94.
47. Gallus S, Lugo A, Pacifici R, et al. E-cigarette awareness, use, and harm perceptions in Italy: a national representative survey. *Nicotine Tob Res*. 2014;16(12):1541-1548.
48. Fraser D, Weier M, Keane H, Gartner C. Vapers' perspectives on electronic cigarette regulation in Australia. *Int J Drug Policy*. 2015;26(6):589-594.
49. Lechner WV, Tackett AP, Grant DM, Tahirkheli NN, Driskill LM, Wagener TL. Effects of duration of electronic cigarette use. *Nicotine Tob Res*. 2015;17(2):180-185.

**Appendix**  
**Overview of Electronic Nicotine Delivery Systems: A Systematic Review**  
**Glasser et al.**

50. Allem JP, Unger JB, Garcia R, Baezconde-Garbanati L, Sussman S. Tobacco Attitudes and Behaviors of Vape Shop Retailers in Los Angeles. *Am J Health Behav.* 2015;39(6):794-798.
51. Andler R, Guignard R, Wilquin JL, Beck F, Richard JB, Nguyen-Thanh V. Electronic cigarette use in France in 2014. *Int J Public Health.* 2016;61(2):159-165.
52. Busch AM, Leavens EL, Wagener TL, Buckley ML, Tooley EM. Prevalence, Reasons for Use, and Risk Perception of Electronic Cigarettes Among Post-Acute Coronary Syndrome Smokers. *Journal of cardiopulmonary rehabilitation and prevention.* 2016.
53. Dutra LM, Glantz SA. Electronic cigarettes and conventional cigarette use among U.S. adolescents: a cross-sectional study. *JAMA Pediatr.* 2014;168(7):610-617.
54. Etter JF. Characteristics of users and usage of different types of electronic cigarettes: findings from an online survey. *Addiction.* 2016;111(4):724-733.
55. Hiscock R, Bauld L, Arnott D, Dockrell M, Ross L, McEwen A. Views from the Coalface: What Do English Stop Smoking Service Personnel Think about E-Cigarettes? *Int J Environ Res Public Health.* 2015;12(12):16157-16167.
56. McQueen N, Partington EJ, Harrington KF, Rosenthal EL, Carroll WR, Schmalbach CE. Smoking Cessation and Electronic Cigarette Use among Head and Neck Cancer Patients. *Otolaryngol Head Neck Surg.* 2016;154(1):73-79.
57. Pechacek TF, Nayak P, Gregory KR, Weaver SR, Eriksen MP. The Potential That Electronic Nicotine Delivery Systems Can be a Disruptive Technology: Results From a National Survey. *Nicotine Tob Res.* 2016.



58. Caponnetto P, Polosa R, Russo C, Leotta C, Campagna D. Successful smoking cessation with electronic cigarettes in smokers with a documented history of recurring relapses: a case series. *J Med Case Rep.* 2011;5(1):585.
59. Farsalinos KE, Romagna G, Tsiapras D, Kyrzopoulos S, Voudris V. Evaluating nicotine levels selection and patterns of electronic cigarette use in a group of "vapers" who had achieved complete substitution of smoking. *Subst Abuse.* 2013;7:139-146.
60. Pepper JK, Ribisl KM, Emery SL, Brewer NT. Reasons for starting and stopping electronic cigarette use. *International Journal of Environmental Research and Public Health.* 2014;11(10):10345-10361.
61. Heydari G, Masjedi M, Ahmady AE, et al. Assessment of Different Quit Smoking Methods Selected by Patients in Tobacco Cessation Centers in Iran. *Int J Prev Med.* 2015;6:81.
62. Pulvers K, Hayes RB, Scheuermann TS, et al. Tobacco Use, Quitting Behavior, and Health Characteristics Among Current Electronic Cigarette Users in a National Tri-Ethnic Adult Stable Smoker Sample. *Nicotine Tob Res.* 2015;17(9):1085-1095.
63. Ramo DE, Young-Wolff KC, Prochaska JJ. Prevalence and correlates of electronic-cigarette use in young adults: findings from three studies over five years. *Addict Behav.* 2015;41:142-147.
64. Pokhrel P, Herzog TA. Reasons for quitting cigarette smoking and electronic cigarette use for cessation help. *Psychol Addict Behav.* 2015;29(1):114-121.
65. Pokhrel P, Little MA, Fagan P, Kawamoto CT, Herzog TA. Correlates of use of electronic cigarettes versus nicotine replacement therapy for help with smoking cessation. *Addict Behav.* 2014;39(12):1869-1873.

**Appendix**  
**Overview of Electronic Nicotine Delivery Systems: A Systematic Review**  
**Glasser et al.**

66. Pokhrel P, Fagan P, Little MA, Kawamoto CT, Herzog TA. Smokers who try e-cigarettes to quit smoking: findings from a multiethnic study in Hawaii. *Am J Public Health*. 2013;103(9):e57-62.
67. Beard E, Brown J, McNeill A, Michie S, West R. Has growth in electronic cigarette use by smokers been responsible for the decline in use of licensed nicotine products? Findings from repeated cross-sectional surveys. *Thorax*. 2015.
68. Cho JH, Paik SY. Association between Electronic Cigarette Use and Asthma among High School Students in South Korea. *PLoS One*. 2016;11(3):e0151022.
69. Lippert AM. Temporal Changes in the Correlates of U.S. Adolescent Electronic Cigarette Use and Utilization in Tobacco Cessation, 2011 to 2013. *Health education & behavior : the official publication of the Society for Public Health Education*. 2016.
70. Stein MD, Caviness CM, Grimone K, Audet D, Borges A, Anderson BJ. E-cigarette knowledge, attitudes, and use in opioid dependent smokers. *J Subst Abuse Treat*. 2015;52:73-77.
71. Kinnunen JM, Ollila H, El-Amin Sel T, Pere LA, Lindfors PL, Rimpela AH. Awareness and determinants of electronic cigarette use among Finnish adolescents in 2013: a population-based study. *Tob Control*. 2015;24(e4):e264-270.
72. Harrell PT, Simmons VN, Pineiro B, et al. E-cigarettes and expectancies: why do some users keep smoking? *Addiction*. 2015.
73. Silver B, Ripley-Moffitt C, Greyber J, Goldstein AO. Successful use of nicotine replacement therapy to quit e-cigarettes: lack of treatment protocol highlights need for guidelines. *Clinical case reports*. 2016;4(4):409-411.
